1 Genes encoding cytochrome P450 monooxygenases and  
2 glutathione S-transferases associated with herbicide  
3 resistance evolved before the origin of land plants

4

5

6 Alexandra Casey<sup>1,2</sup>, Liam Dolan<sup>1,\*</sup>

7

8 <sup>1</sup> Gregor Mendel Institute, Vienna, Austria

9 <sup>2</sup> Department of Plant Sciences, University of Oxford, Oxford, Oxfordshire, UK

10

11 \*Lead Contact

12 Correspondence: [liam.dolan@gmi.oeaw.ac.at](mailto:liam.dolan@gmi.oeaw.ac.at)

13

14

15

16

17

18

19

## 20 Abstract

21 Cytochrome P450 (CYP) monooxygenases and glutathione S-transferases (GST) are enzymes that  
22 catalyse chemical modifications of a range of organic compounds. Herbicide tolerance is associated  
23 with higher levels of CYP and GST gene expression in some herbicide-resistant weed populations  
24 compared to sensitive populations of the same species. By comparing the protein sequences of 9  
25 representative species of the Archaeplastida – the lineage which includes red algae, glaucophyte  
26 algae, chlorophyte algae, and streptophytes – and generating phylogenetic trees, we identified the  
27 CYP and GST proteins that existed in the common ancestor of the Archaeplastida. All CYP clans and  
28 all but one land plant GST classes present in land plants evolved before the divergence of  
29 streptophyte algae and land plants from their last common ancestor. We also demonstrate that  
30 there are more genes encoding CYP and GST proteins in land plants than in algae. The larger  
31 numbers of genes among land plants largely results from gene duplications in CYP clans 71, 72, and  
32 85 and in the GST Phi and Tau classes. Enzymes that either chemically alter herbicides or confer  
33 herbicide resistance belong to CYP clans 71 and 72 and the GST Phi and Tau classes. These results  
34 demonstrate that the clan and class diversity in extant plant CYP and GST proteins evolved in the  
35 Proterozoic before the divergence of land plants and streptophyte algae from a last common  
36 ancestor. Then, early in embryophyte evolution during the Palaeozoic, gene duplication in four of  
37 the twelve CYP clans, and in two of the fourteen GST classes, led to the large numbers of CYP and  
38 GST proteins found in extant land plants. It is among the genes of CYP clans 71 and 72 and GST  
39 classes Phi and Tau that alleles conferring herbicide resistance evolved in the last fifty years.

40

## 41 Introduction

42 Herbicide resistance evolves in weed populations and poses a challenge in all agricultural  
43 landscapes where chemical herbicides are used for weed control. This resistance can result from two

44 types of mutations. Mutations in the gene targeted by the herbicide which inhibit the interaction  
45 between the two confer target site resistance (TSR). Non target site resistance (NTSR) results either  
46 from mutations that reduce the amount of herbicide chemical reaching the target or that alleviate  
47 the herbicide-induced damage [1]. Reported mechanisms of NTSR involve the reduction of herbicide  
48 uptake or translocation, chemical modification of the herbicide, or sequestration of the herbicide to  
49 a location where it cannot access the target [2–4]. Genetic changes in genes encoding enzymes that  
50 can chemically modify the herbicide, including changes such as overexpression, the expression of  
51 hyperactive forms of the enzymes, or enzymes with altered substrate specificity, can inactivate the  
52 herbicide, conferring resistance [5–7]. Mutations that result in NTSR are selected for in agricultural  
53 landscapes where chemical herbicides are used and can reach high allele frequencies in the presence  
54 of ongoing herbicide selection. While the genetic basis of NTSR is often complex and mechanistically  
55 poorly understood, the overexpression of genes encoding cytochrome P450 monooxygenases and  
56 glutathione s-transferases has been shown to confer resistance in weed populations [8–10].

57         Glutathione-s-transferases (GSTs) are an ancient superfamily of enzymes found in  
58 eukaryotes and prokaryotes. GSTs catalyse the conjugation of glutathione (GSH) to both endogenous  
59 and exogenous electrophilic, hydrophobic substrates to form more polar, hydrophilic compounds.  
60 GSTs also catalyse GSH-dependent peroxidase, isomerase, and deglutathionylation reactions. In  
61 plants, GSTs are active in diverse processes including abiotic and biotic detoxification pathways  
62 [11,12], ascorbic acid metabolism [13], hormone signalling such as auxin and cytokinin homeostasis  
63 [14–16], metabolism of anthocyanins and flavonoids [17,18], tyrosine catabolism [19], and in  
64 preventing apoptosis [20].

65         GSTs function as either monomers or dimers. Each monomer is characterised by a conserved  
66 N-terminal domain containing the active site and several GSH binding site residues (G-sites), and a  
67 less conserved C-terminal domain comprising alpha helices with class-specific substrate binding sites  
68 (H-sites) [21]. Plant GSTs are classified into groups as cytosolic, mitochondrial, or microsomal and  
69 each group is further subdivided into classes. In plants there are 12 cytosolic GST classes. These

70 include Tau (GSTU), Phi (GSTF), Theta (GSTT), Lambda (GSTL), Zeta (GSTZ), Iota (GSTI), Hemerythrin  
71 (GSTH), tetrachlorohydroquinone dehalogenase (TCHQD), eukaryotic translation elongation factor  
72 1B- $\gamma$  subunit (Ef1By), Ure2p, glutathionyl hydroquinone reductase (GHR), and dehydroascorbate  
73 reductase (DHAR). In contrast, there is only a single microsomal GST class, microsomal prostaglandin  
74 E-synthase type 2 (mPGES2), and a single mitochondrial GST class, Metaxin (GSTM).

75         Cytochrome p450 monooxygenases (CYPs) are a superfamily of membrane-bound enzymes  
76 present in plants, fungi, bacteria, and animals. They are heme-thiolate proteins that use molecular  
77 oxygen and NADPH to modify substrates with diverse chemical reactions including oxidations,  
78 hydroxylations, dealkylations, and reductions [22] and are implicated in a wide array of biochemical  
79 pathways. CYPs participate in the synthesis and modification of primary metabolites such as sterols  
80 and fatty acids, secondary metabolites such as phenylpropanoids, glucosinolates, and carotenoids,  
81 and the synthesis and catabolism of hormones such as gibberellins, jasmonic acid, abscisic acid,  
82 brassinosteroids, and strigolactones [22–24].

83         CYPs are characterised by a conserved heme-binding domain, an oxygen binding domain,  
84 two conserved motifs (X-E-X-X-R and P-E-R-F) that form what is known as the ERR triad and is  
85 involved in positioning and stabilising the heme pocket, and several highly variable substrate  
86 positioning and recognition sites [25]. The three-dimensional structure of CYPs is conserved across  
87 the family even though the amino acid sequences of individual members may be as little as 20%  
88 identical [26–30]. Previous phylogenetic analyses of CYPs grouped them into monophyletic clades  
89 termed clans, each containing one or more CYP families [31–33], with clans being named after their  
90 lowest numbered family member [34]. Clans represent the deepest clades that reproducibly appear  
91 in multiple phylogenetic trees.

92         Here we report the phylogenetic relationships among both the GST and CYP proteins within  
93 the Archaeplastida lineage. We discovered that those CYPs and GSTs that confer herbicide resistance  
94 among weeds are restricted to two monophyletic clans and two monophyletic classes, respectively.

95 These clans and classes already existed in the common ancestor of land plants, which is estimated to  
96 have existed between 980 and 473 Mya [35–37]. These clans and classes diversified early in land  
97 plant evolution and now constitute the largest groups of CYP and GST proteins in extant vascular  
98 plants. This analysis suggests that natural selection caused by herbicides acts on sets of ancient  
99 genes that existed in the last common ancestor of the land plants and *K. nitens*, a streptophyte alga,  
100 and diversified in vascular plants, leading to the evolution of herbicide resistance in the agricultural  
101 landscape.

102

103

104

105

106

107

108

109

110

111

112

113

## 114 Materials and methods

### 115 Data resources

116 Protein sequences from *A. thaliana* were retrieved from TAIR10 [38] (<https://www.arabidopsis.org/>)  
117 Protein sequences from *Oryza sativa* were retrieved from the rice genome annotation project [39]  
118 (<http://rice.plantbiology.msu.edu/>). Protein sequences from the liverwort *M. polymorpha* were  
119 obtained from MarpolBase (<http://marchantia.info/>). Protein sequences from the hornwort  
120 *Anthoceros agrestis* were obtained from [40] (<https://www.hornworts.uzh.ch/en/download.html>).  
121 Protein sequences from the streptophyte alga *Klebsormidium nitens* were obtained from the *K.*  
122 *nitens* genome webpage [41]  
123 ([http://www.plantmorphogenesis.bio.titech.ac.jp/~algae\\_genome\\_project/klebsormidium/](http://www.plantmorphogenesis.bio.titech.ac.jp/~algae_genome_project/klebsormidium/)). Protein  
124 sequences from the moss *Physcomitrium patens* and the chlorophyte alga *Chlamydomonas*  
125 *reinhardtii* were retrieved from Phytozome 12 [42] (<https://phytozome.jgi.doe.gov/pz/portal.html>).  
126 Protein sequences from the red alga *Cyanidioschyzon merolae* were retrieved from the *C. merolae*  
127 genome webpage [43] ([https://www.genome.jp/kegg-bin/show\\_organism?org=cme](https://www.genome.jp/kegg-bin/show_organism?org=cme)).

128 A classification of CYP genes from *A. thaliana*, *S. moellendorffii*, *P. patens*, *C. reinhardtii* is  
129 available on The Cytochrome P450 Homepage [44] (<http://drnelson.uthsc.edu/plants/>). Two other  
130 Arabidopsis CYP databases can be found on the Arabidopsis Cytochrome P450 List [45]  
131 ([http://www.p450.kvl.dk/At\\_cyps/table.shtml](http://www.p450.kvl.dk/At_cyps/table.shtml)) and CyPEDIA [46] ([http://www-ibmp.u-](http://www-ibmp.u-strasbg.fr/~CYPedia/)  
132 [strasbg.fr/~CYPedia/](http://www-ibmp.u-strasbg.fr/~CYPedia/)). The classification of *O. sativa* CYPs is available on the University of California,  
133 Davis Rice CYP Database (<https://ricephylogenomics.ucdavis.edu/p450/>).

### 134 Sequence collection

135 CYP protein sequences from *A. thaliana* and *O. sativa* [47,48] were used to perform BLASTP searches  
136 using a minimum E value cut-off of  $1e^{-10}$  against the predicted proteomes of *S. moellendorffii*, *M.*  
137 *polymorpha*, *A. agrestis*, *P. patens*, *K. nitens*, *C. reinhardtii*, and *C. merolae*. GST protein sequences

138 were retrieved by BLASTP searches using GST proteins from *A. thaliana* [49,50], *O. sativa* [51,52],  
139 and *P. patens* [53] against the predicted proteomes of *S. moellendorffii*, *M. polymorpha*, *A. agrestis*,  
140 *K. nitens*, *C. reinhardtii*, and *C. merolae*. This initial list of sequences for each species was self-blasted  
141 against the proteome of that species to retrieve additional sequences belonging to species-specific  
142 clans. Each CYP sequence was checked for the presence of the cytochrome p450 domain (PF00067,  
143 IPR00128) and each GST sequence was checked for the presence of the GST N-terminal domain  
144 (IPR004045, IPR019564, PF13409, PF17172, PF13417 and PF02798) and C-terminal domain  
145 (IPR010987, PF13410, PF00043, PF14497 and PF17171) using InterProScan 84.0 [54].

146 Two GST classes, mitochondrial Kappa and microsomal MAPEG, don't possess a GST N-  
147 terminal thioredoxin-like domain or GST C-terminal domain and lack the N-terminal active site found  
148 in all other GST proteins. An additional group of sequences was identified by this analysis possessing  
149 two GST N-terminal domains but lacking a C-terminal domain. Protein sequences belonging to the  
150 Kappa, MAPEG, and 2N classes were therefore not included in the phylogenetic analysis but are  
151 listed in S5 Table.

## 152 Sequence alignment

153 Sequences were aligned in MAFFT [55] using the FFT-NS-2 algorithm and visualised in Bioedit [56].  
154 Sequences lacking important functional residues were removed. To trim large gaps, four approaches  
155 to alignment cleaning were undertaken. A manual approach was carried out using knowledge of the  
156 location of the functionally important CYP and GST residues. A more stringent trimming approach  
157 was also tested with the trimming software trimAl v.1.2. [57] using the three automated modes (-  
158 gappyout, -strict and -strictplus) (S2 Fig).

## 159 Phylogenetic analysis

160 The final alignments were subjected to a maximum-likelihood analysis conducted by PHyML 3.0 [58]  
161 using an estimated gamma distribution parameter, the LG+G+F model of amino acid substitution,

162 and a Chi<sup>2</sup>-based approximate likelihood ratio test (aLRT). The resulting unrooted trees were  
163 visualised in Figtree v1.4.4 [59] and annotated in Inkscape v1.0.2 [60].

164

165

166

167

168

169

170

171

172

173

174

175

176

177

178

179

180

181

182

183



## 184 Results

### 185 1130 CYP and 358 GST sequences were identified in the genomes of 9 186 species of Archaeplastida

187 To determine the phylogenetic relationships among CYP and GST sequences in the Archaeplastida  
188 lineage, we collected sequences from online resources. CYP and GST protein-coding genes in 9  
189 species (Table 1) representing key Archaeplastida lineages were identified as described in Methods.  
190 The resulting 1130 CYP and 358 GST sequences included sequences from the red alga  
191 *Cyanidioschyzon merolae* (5 CYP and 9 GST proteins), the chlorophyte alga *Chlamydomonas*  
192 *reinhardtii* (40 CYP and 19 GST proteins), the streptophyte alga *Klebsormidium nitens* (29 CYP and 24  
193 GST proteins), the liverwort *Marchantia polymorpha* (115 CYP and 35 GST proteins), the moss  
194 *Physcomitrium patens* (69 CYP and 42 GST proteins), the hornwort *Anthoceros agrestis* (144 CYP and  
195 26 GST proteins), the lycophyte *Selaginella moellendorffii* (199 CYP and 57 GST proteins), and the  
196 angiosperms *Oryza sativa* (291 CYP and 85 GST proteins) and *Arabidopsis thaliana* (238 CYP and 61  
197 GST proteins) (Table 1). The *M. polymorpha* CYP sequences were named following the standard CYP  
198 nomenclature [34].

199

200

201

202

203

204

205

206

207 **Table 1. List of species used in the analysis.**

| Species                           | Classification     | Genome (Mb) | Protein-coding genes | GSTs | GSTs (% PCG) | CYPs | CYPs (% PCG) | References |
|-----------------------------------|--------------------|-------------|----------------------|------|--------------|------|--------------|------------|
| <i>Arabidopsis thaliana</i>       | Angiosperm eudicot | 135         | 25,498               | 61   | 0.24         | 238  | 0.93         | [61]       |
| <i>Oryza sativa</i>               | Angiosperm monocot | 321         | 35,681               | 85   | 0.24         | 291  | 0.82         | [39]       |
| <i>Selaginella moellendorffii</i> | Lycophyte          | 212.6       | 22,285               | 57   | 0.26         | 199  | 0.89         | [62]       |
| <i>Anthoceros agrestis</i>        | Hornwort           | 133         | 24,700               | 26   | 0.11         | 144  | 0.58         | [40]       |
| <i>Physcomitrella patens</i>      | Moss               | 480         | 35,938               | 42   | 0.12         | 69   | 0.19         | [63]       |
| <i>Marchantia polymorpha</i>      | Liverwort          | 225.8       | 19,138               | 35   | 0.18         | 115  | 0.60         | [64]       |
| <i>Klebsormidium nitens</i>       | Streptophyte alga  | 117.1       | 16,215               | 24   | 0.15         | 29   | 0.18         | [41]       |
| <i>Chlamydomonas reinhardtii</i>  | Chlorophyte alga   | 120         | 15,143               | 19   | 0.13         | 40   | 0.26         | [65]       |
| <i>Cyanidioschyzon merolae</i>    | Rhodophyte alga    | 16.5        | 5,331                | 9    | 0.17         | 5    | 0.09         | [43]       |

208 Including their phylum (Classification), genome size (Genome), total number of protein-coding genes (Protein-coding  
209 genes), total number of GST proteins (GSTs), GST proteins as a percentage of total protein coding genes (GSTs % PCG), total  
210 number of CYP proteins (CYPs), CYP proteins as a percentage of total protein coding genes (CYPs % PCG) and the  
211 bibliographical reference for each genome sequence.

212

213 Alignments were generated from the identified sequences and used to construct  
214 phylogenetic trees, using four alignment trimming approaches. The sequences were manually  
215 trimmed to retain the homologous domains and remove large gaps. A more stringent trimming  
216 approach was also tested with the trimming software trimAl v.1.2. [57] using the three automated  
217 modes (-gappyout, -strict and -strictplus) (S2 Fig). For both the GST and CYP phylogenetic trees, the  
218 approximate likelihood ratio test (aLRT) support values for the deepest clades of the maximum-  
219 likelihood (ML) trees resulting from the trimAl -strict and -strictplus alignments were low (0-0.23).  
220 The ML trees generated from the trimAl -gappyout alignments had correct tree topologies but had  
221 low aLRT support values for the main clades (0.05-0.23). The ML trees generated from the manually

222 trimmed GST and CYP alignments had the overall highest aLRT values (>0.8) for the main clades and  
223 were selected as the representative trees for further analysis (Fig 1).

224

225 **Fig 1. Phylogenetic analysis of CYP and GST protein sequences in the Archaeplastida.**

226 Unrooted cladogram of a maximum likelihood (ML) analysis of Archaeplastida CYP (A) and GST (B)  
227 proteins conducted by PHyML 3.0 [58] using an estimated gamma distribution parameter, the  
228 LG+G+F model of amino acid substitution, and a Chi<sup>2</sup>-based approximate likelihood ratio (aLRT) test.  
229 Protein sequences were aligned using MAFFT with the L-INS-i algorithm. CYP clans are indicated by  
230 light green highlighting and numbers. GST classes are indicated by light yellow highlighting and  
231 acronyms. Coloured dots indicate the presence of sequences from different species in each clan. *A.*  
232 *thaliana* (orange); *O. sativa ssp. japonica* (grey); *Selaginella moellendorffii* (yellow); *Physcomitrium*  
233 *patens* (cyan); *Anthoceros agrestis* (blue); *Marchantia polymorpha* (black); *Klebsormidium nitens*  
234 (purple); *Chlamydomonas reinhardtii* (green); *Cyanidioschyzon merolae* (red).

235

236 **Plant CYP clans are ancient and two CYP clans existed in the last**  
237 **common ancestor of the Archaeplastida**

238 To elucidate the evolution of CYPs in Archaeplastida, we constructed a phylogenetic tree using a  
239 maximum likelihood approach (Fig 1A). This analysis demonstrated that CYPs from the 9  
240 representative species of Archaeplastida grouped into 17 monophyletic clans, consistent with  
241 previous analyses of plant CYP phylogeny [31–33].

242 CYPs encoded by the genomes of land plants *A. agrestis*, *M. polymorpha*, *P. patens*, *S.*  
243 *moellendorffii*, *O. sativa*, and *A. thaliana* corresponded to 12 of the 17 clans identified in the  
244 Archaeplastida – 51, 71, 72, 74, 85, 86, 97, 710, 711, 727, 746, and 747. Each of these 12 clans was  
245 also represented in the genome of the streptophyte alga *K. nitens*. This indicates that these clans

246 existed before the divergence of *K. nitens* and land plants from their last common ancestor.  
247 Members of 6 of the 12 clans – 71, 72, 74, 85, 86, and 727 – were not present in the genome of *C.*  
248 *reinhardtii*. This suggests that these 6 clans originated in the streptophyte lineage after the  
249 divergence of chlorophytes and streptophytes from their last common ancestor but before the  
250 divergence of *K. nitens* (Fig 2A). Members of the other 6 of the 12 CYP clans – 51, 97, 710, 711, 746,  
251 and 747 – were encoded by the *C. reinhardtii* genome indicating that they were present before the  
252 divergence of streptophytes and chlorophytic algae from the last common ancestor. Two of the  
253 clans were also present in red algae; there is one member of clan 51 and two members of clan 710 in  
254 the genome of *C. merolae*. This places the origin of clan 51 and clan 710 before the divergence of  
255 Rhodophyta and Viridiplantae (Fig 2A). We conclude that clans 51 and 710 were present in the last  
256 common ancestor of Archaeplastida and therefore constitute the most ancient Archaeplastida clans.

257

258 **Fig 2. Four CYP clans and two GST classes expanded during land plant evolution.**

259 Cladogram of Archaeplastida phylogeny showing CYP clan (A) and GST class (C) origins and losses in  
260 plants. Blue circles represent first appearance of a clan/class, black circles represent the absence of a  
261 clan or class in a particular lineage. Numbers of CYP proteins in each species showing increases in the  
262 sizes of four CYP clans (B) and two GST classes (D) during land plant evolution.

263

264 Three clans – 55, 737, and 741 – were restricted to *C. reinhardtii*. There is a single clan 55  
265 member in *C. reinhardtii*, CrCYP55B1, which was sister to the clan 51 clade. Members of clan 55 are  
266 also present in fungi and hypothesised to have been acquired by *C. reinhardtii* from fungi through  
267 horizontal gene transfer [66]. Two *C. reinhardtii* CYP protein sequences – CrCYP741A1 and  
268 CrCYP768A1 – formed a monophyletic clade, clan 741, that was sister to the clade comprising clans  
269 86, 97, and 747. Thirty *C. reinhardtii* CYP sequences formed a monophyletic clade – clan 737 – which

270 was sister to the clade containing the 86, 97, 741, and 747 clans. These data are consistent with the  
271 hypothesis that clans 737 and 741 are chlorophyte specific.

272 Two clans – Cm1 and Cm2 – comprised only single red algae proteins. Cm1 (CMD096C) was  
273 sister to the clade containing clans 72, 86, 97, 711, 727, 737, 746, and 747. Clan Cm1 and clans 72,  
274 86, 97, 711, 727, 737, 746, and 747 are therefore likely derived from a protein present in the  
275 common ancestor of the red algae and the green plant lineage (chlorophytes and streptophytes).  
276 Cm2 (CMR093C) was sister to clan 710 but shares very low amino acid identity (20%) with members  
277 of 710. Cm2 is possibly an ancestral 710 protein or it could represent a red-algae specific clan. Clans  
278 Cm2 and 710 are therefore likely derived from a protein present in the common ancestor of the red  
279 algae and the green plant lineage (chlorophytes and streptophytes).

280 In summary, our phylogenetic analysis shows that each of the of the land plant CYP clans are  
281 also present in the genome of the streptophyte alga *K. nitens*. This indicates that the diversity of CYP  
282 sequences in plants evolved among algae in the aquatic environment before plants colonised land  
283 between 980 and 470 million years ago [35–37]. No new clans evolved among land plants after their  
284 colonisation of the land. Instead, the number of genes in each clan increased. Five CYP clans present  
285 in land plants and streptophyte algae are also present in the genome of the chlorophyte alga *C.*  
286 *reinhardtii*, which places their origin before the divergence of the chlorophyte and streptophyte  
287 lineages from their last common ancestor. Two clans found in land plants, streptophyte algae, and  
288 chlorophytes – 51 and 710 – are also present in the red algae. This suggests that these clans are the  
289 most ancient Archaeplastida clans and evolved before the divergence of Rhodophyta and  
290 Viridiplantae from their last common ancestor.

291

## 292 Plant GST classes are ancient, and 11 classes existed in the last 293 common ancestor of the Archaeplastida

294 To elucidate the evolutionary history of GST classes in Archaeplastida, sequences were retrieved,  
295 aligned, and a phylogenetic tree constructed using maximum likelihood statistics (Fig 1B). The  
296 topology of the trees demonstrated that GSTs from the 9 representative species of Archaeplastida  
297 constituted 19 monophyletic classes – Ala, Alb, Alc, Cr1, DHAR, EF1B- $\gamma$ , GHR, Hemerythrin, Iota, Kn1,  
298 Lambda, Metaxin, mPGES2, Phi, Tau, TCHQD, Theta, Ure2p, and Zeta. Of these 19 classes, 14 are  
299 encoded in the genomes of the land plant species *A. agrestis*, *M. polymorpha*, *P. patens*, *S.*  
300 *moellendorffii*, *O. sativa* and *A. thaliana* – DHAR, EF1B- $\gamma$ , GHR, Hemerythrin, Iota, Lambda, Metaxin,  
301 mPGES2, Phi, Tau, TCHQD, Theta, Ure2p and Zeta (Fig 1B). Five of the 19 classes are novel GST  
302 classes identified in algal genomes, named Ala, Alb, Alc, Cr1, and Kn1.

303 16 algal GST sequences comprised several different monophyletic clades. Three *C. reinhardtii*  
304 sequences and one *C. merolae* sequence comprised class Alc, which is a sister to the Ure2p class (Fig  
305 1B). However, these sequences lacked a characteristic Ure2p protein domain (cd03048) and were  
306 therefore not included in the Ure2p class. Class Alb, which included one *K. nitens* sequence and one  
307 *C. merolae* sequence, is a sister to the monophyletic clade comprising both the Ure2p and Alc  
308 classes. Class Ala, comprising 7 *C. reinhardtii* sequences and a single *C. merolae* sequence, is a sister  
309 to the clade containing Phi, Theta, EF1B- $\gamma$ , Ure2p, Alb, and Alc GST sequences. Ala, Alb, and Alc may  
310 represent classes that evolved in the ancestor of Archaeplastida, where Ala and Alc were lost in the  
311 common ancestor of Streptophytes, and Alb was lost in the chlorophyte lineage and in the common  
312 ancestor of land plants.

313 Two individual algal sequences formed two independent clades. A *C. reinhardtii* sequence  
314 (Cre12.g508850.t1) was sister to the TCHQD class. However, this sequence lacked a TCHQD protein  
315 domain (IPR044617) and was therefore designated Cr1. A *K. nitens* sequence (Kfl00304\_0120\_v1)  
316 was sister to the Lambda class, however there was no GST Lambda class C-terminal domain

317 (cd03203). This sequence was designated Kn1. These data suggest that Cr1 evolved in the  
318 chlorophyte lineage and Kn1 evolved in the streptophyte algal lineage.

319 Of the 14 GST classes present in the genomes of the land plants *A. agrestis*, *M. polymorpha*,  
320 *P. patens*, *S. moellendorffii*, *O. sativa* and *A. thaliana*, 9 classes – EF1B- $\gamma$ , GHR, Metaxin, mPGES2, Phi,  
321 TCHQD, Theta, Ure2p, Zeta – are also found in non-plant genomes (such as metazoans, bacteria,  
322 archaea, and fungi) and therefore predate the origin of the Archaeplastida [53,67–71]. The other 5  
323 GST classes – DHAR, Hemerythrin, Iota, Lambda, and Tau – have only been described from the  
324 genomes of land plants and chlorophyte and streptophyte algae [49,51,53,72]. Our analysis shows  
325 that Lambda and Tau members are present in the genome of the streptophyte alga *K. nitens* but not  
326 in the *C. reinhardtii* and *C. merolae* genomes. This indicates that these classes evolved among the  
327 streptophytes after the divergence of the red algae and chlorophytes but before the divergence of *K.*  
328 *nitens* and land plants. Members of the Hemerythrin class were found in genomes of the bryophytes  
329 *P. patens*, *M. polymorpha*, and *A. agrestis* and the lycophyte *S. moellendorffii*, but not in the  
330 angiosperms or in *K. nitens*, *C. reinhardtii*, or *C. merolae*. This suggests that the Hemerythrin class  
331 originated in the common ancestor of bryophytes and vascular plants but was lost in the common  
332 ancestor of the angiosperms. There are DHAR members in the genomes of *K. nitens* and *C.*  
333 *reinhardtii*. This suggests that DHAR GST proteins were present in the last common ancestor of  
334 chlorophytes and streptophytes. There are Iota members in *C. merolae*, *C. reinhardtii*, and *K. nitens*  
335 indicating that Iota class enzymes originated before the divergence of rhodophytes and chlorophytes  
336 in the common ancestor of Archaeplastida (Fig 2C).

337 There are 26 GST proteins belonging to 12 classes in the genome of the hornwort  
338 *Anthoceros agrestis* (S2 Table). One sequence (AagrOXF\_evm.model.utg000005l.356.1) nested  
339 within the monophyletic Tau GST clade and contained the conserved N- and C-terminal Tau class  
340 catalytic motifs (cd03058 and cd03185). This is strong evidence that  
341 AagrOXF\_evm.model.utg000005l.356.1 is a Tau GST. Tau GST proteins are also present in  
342 streptophyte algae, liverworts, and vascular plants but absent from mosses. This suggests that the

343 Tau GST class was present in the last common ancestor of the streptophyte algae and subsequently  
344 lost in the moss lineage (Fig 2C).

345 In summary, this analysis showed that Archaeplastida GST proteins comprise 19 classes. 11  
346 classes – Ala, Alb, Alc, EF1B- $\gamma$ , GHR, Iota, Metaxin, mPGES2, TCHQD, Theta, and Zeta – were present  
347 in the common ancestor of the Archaeplastida. 12 classes originated after the divergence of  
348 Archaeplastida from other eukaryotes. The earliest GST classes to arise in Archaeplastida were the  
349 Ala, Alb, Alc, and Iota classes, which originated before the separation of rhodophyte and chlorophyte  
350 lineages. The DHAR class originated in the common ancestor of chlorophytes and streptophytes. The  
351 Cr1 class originated in the chlorophyte lineage. Lambda, Tau, Phi, and Ure2p GSTs originated in the  
352 last common ancestor of streptophyte algae and land plants. Kn1 originated in the streptophyte  
353 algae. The most recently diverging plant GST class, the Hemerythrin class, originated in the last  
354 common ancestor of land plants.

355

356 **CYP clans 71, 72, 85, and 86 and GST classes Phi and Tau GST**

357 **expanded among land plants**

358 The number of CYP genes encoded in the genomes of land plants is larger than the number encoded  
359 in the genomes of algae. We identified between 5 and 40 CYP protein genes in algae – 5 in *C.*  
360 *merolae*, 40 in *C. reinhardtii*, and 29 in *K. nitens*. We identified between 69 and 144 among the  
361 bryophytes – 69 in *A. agrestis*, 115 in *P. patens*, and 144 in *M. polymorpha* genomes. Among the  
362 vascular plants we identified between 199 and 291 – 199 in *S. moellendorffii*, 238 in *A. thaliana*, and  
363 291 in *O. sativa* genomes (Table 1, S1 Table).

364 To determine if CYP gene numbers are correlated with the numbers of total protein coding  
365 genes in land plants, we calculated the percentage of protein-coding genes that encoded CYP  
366 proteins. CYPs represent 0.18% of the protein-coding genes in the streptophyte alga *K. nitens*, 0.19-



367 0.60% in bryophytes, and 0.82-0.93% in vascular plants (Table 1). These data are consistent with the  
368 hypothesis that the larger number of CYP genes in bryophytes and vascular plants compared to algae  
369 is not simply due to a general increase in gene number.

370 To identify the clans responsible for the increase in CYPs in land plants, clan gene numbers  
371 were compared between species. There are more genes in clans 71, 72, 85, and 86 in land plants  
372 than in streptophyte algae (Fig 2B, S1 Table), with clan 71 gene numbers differing the most between  
373 species. There are three 71 clan members in the genome of the streptophyte alga *K. nitens*. Among  
374 the bryophytes there are 59 clan 71 members in the hornwort *A. agrestis*, 68 in the liverwort *M.*  
375 *polymorpha* and 38 in the moss *P. patens*. Among the vascular plants there are 98 in the lycophyte *S.*  
376 *moellendorffii*, 148 in *A. thaliana*, and 163 in *O. sativa* (S1 Table). Clan 71 proteins represent 10% of  
377 all CYPs in *K. nitens* but 40-60% of all CYPs in the land plants. Together these data are consistent with  
378 the hypothesis that the expansion in the numbers of clan 71 genes contributed to the large number  
379 of CYP proteins in land plants compared to algae (non-land plant Archaeplastida). There are only a  
380 small number of genes in eight CYP clans across all streptophyte species – 51, 74, 97, 710, 711, 727,  
381 746, and 747. Generally, there were fewer than 10 members in each of these clans in any one  
382 species (S1 Table). Thus, these clans therefore represent monophyletic groups that did not diversify  
383 among land plants.

384 Despite the smaller number of GST classes in land plants compared to algae, there are more  
385 GST protein coding genes in land plants than in algae. We identified 9 GST genes in the genome of *C.*  
386 *merolae*, 19 in *C. reinhardtii*, and 24 in *K. nitens*. Among the bryophytes we identified 35 in *M.*  
387 *polymorpha*, 42 in *P. patens* and 26 in *A. agrestis*. Among the vascular plants we identified 57 in *S.*  
388 *moellendorffii*, 85 in *O. sativa* and 61 in *A. thaliana* (Table 1, S2 Table). Genes coding for GST proteins  
389 represent 0.15% of all protein coding genes in *K. nitens*, 0.11-0.18% in bryophytes, and 0.24-0.26% in  
390 vascular plants (Table 1). These data are consistent with the hypothesis that the larger number of  
391 GST genes in vascular plants than in algae is not due to a general increase in protein number, but  
392 due to GST family expansion.

393 To identify the classes responsible for the increase in GSTs in vascular plants, gene numbers  
394 in each GST class were compared between species. The number of GST proteins in the Phi and Tau  
395 classes is larger in land plants than in streptophyte algae. There are 3 Phi class members in the  
396 genome of the streptophyte alga *K. nitens*. Among the bryophytes there are 18 Phi class genes in the  
397 genome of *M. polymorpha*, 10 in *P. patens* and 11 in *A. agrestis*. Only 1 Phi GST was identified in the  
398 genome of the lycophyte *S. moellendorffii*. Among the angiosperms, there are 19 Phi GST proteins in  
399 *O. sativa* and 13 in *A. thaliana*. This suggests that the Phi class expanded in the land plant lineage  
400 after the divergence of streptophyte algae and land plants from the last common ancestor but  
401 before the divergence of bryophytes and vascular plants. There are also more Tau class GST proteins  
402 in vascular plant genomes than in either the algal or bryophyte genomes (Fig 2D). There are 3 Tau  
403 class genes in the genome of *K. nitens*. Among the early diverging land plants there are 2 Tau class  
404 members in *M. polymorpha*, 1 in *A. agrestis* and none in *P. patens*. Among the vascular plants there  
405 are 34 in *S. moellendorffii*, 49 in *O. sativa* and 28 in *A. thaliana*. This suggests that the Tau class  
406 expanded in vascular plants after the divergence of bryophytes and vascular plants. In the other 17  
407 GST classes in Archaeplastida – Ala, Alb, Alc, Cr1, DHAR, EF1B- $\gamma$ , GHR, Hemerythrin, Iota, Kn1,  
408 Lambda, Metaxin, mPGES2, TCHQD, Theta, Ure2p, and Zeta – gene numbers are less than 10 in each  
409 species (S2 Table), indicating these these classes have not expanded during the course of evolution.

410 In summary, our phylogenetic analysis shows that the 2 to 10-fold larger number of CYP  
411 genes in the genomes of land plants than in the streptophyte alga *K. nitens* results from expansions  
412 of clans 71, 72, 85, and 86. The 1.5 to 3.5-fold more GST genes in land plants than in the  
413 streptophyte alga *K. nitens* results from expansions of the Phi and Tau classes.

414

## 415 Herbicide metabolic resistance is associated with proteins from the 416 GST Phi and Tau classes and CYP 71 and 72 clans

417 GSTs and CYPs have been genetically associated with herbicide resistance in crops and weed  
418 populations [73,74]. To identify which CYP clans and GST classes are genetically and/or metabolically  
419 associated with herbicide resistance, a literature search was conducted. CYPs or GSTs reported in  
420 previous studies to increase herbicide resistance in transgenic plants or to metabolise herbicides  
421 were classified as NTSR genes (S3 and S4 Tables). CYPs and GSTs found to have increased expression  
422 in herbicide resistant weeds, but whose function was not experimentally validated, were classified as  
423 “candidate NTSR genes” and are listed in S5 and S6 Tables.

424

## 425 Clan 71 and clan 72 CYP proteins are associated with resistance to herbicides 426 from 16 chemical classes

427 A total of thirty plant CYPs have been experimentally shown to metabolise or confer resistance to  
428 one or more herbicides in sensitivity or metabolism assays (Fig 3A, S3 Table). These CYPs were  
429 identified in the model plant *Arabidopsis* (*A. thaliana*) [75,76], the grass weeds barnyard grass  
430 (*Echinochloa phyllopogon*) [77–79], shortawn foxtail (*Alopecurus aequalis*) [80] and annual ryegrass  
431 (*Lolium rigidum*) [81], the gymnosperm western red cedar (*Thuja plicata*) [82], and the crops barley  
432 (*Hordeum vulgare*) [83], rice (*Oryza sativa*) [84–86], wheat (*Triticum aestivum*) [87], maize (*Zea  
433 mays*) [88], cotton (*Gossypium hirsutum*) [89], soybean (*Glycine max*) [90,91], ginseng (*Panax  
434 ginseng*) [92], Jerusalem artichoke (*Helianthus tuberosus*) [93,94] and tobacco (*Nicotiana tabacum*)  
435 [95]. These 29 CYPs metabolised or conferred resistance to diverse herbicide chemical classes, with  
436 the majority (24 of 29) metabolising phenylureas or sulfonylureas (S3 Table).

437

438 **Fig 3. GST and CYP proteins associated with herbicide resistance belong to the Lambda, Phi, and**  
439 **Tau classes and clans 71 and 72.**

440 (A) Number of CYP proteins associated with herbicide resistance (white bars), present in the *A.*  
441 *thaliana* genome (light grey bars) and in the *O. sativa* genome (dark grey bars), per clan. (B) Number  
442 of GST proteins associated with herbicide resistance (white bars), present in the *A. thaliana* genome  
443 (light grey bars) and the *O. sativa* genome (dark grey bars) per clan. (C) Number of CYP proteins  
444 associated with resistance per clan, with family membership indicated by colours. The most  
445 represented family among CYPs associated with herbicide resistance is the CYP81 family. Numbers  
446 over or within bars represent the number of proteins within that category.

447

448 All thirty of the herbicide-metabolising CYPs belong to clan 71 or 72 (Fig 3A). Twenty-six clan  
449 71 enzymes have been shown to confer resistance to benzothiadiazinones, clomazone, DEN, DIM,  
450 FOP, isoxazolidinones, phenylureas, pyrazoles, pyridazinones, thiobenzoates, sulfonylaminocarbonyl-  
451 triazolinones, sulfonylureas, thiadiazines, triazolopyrimidines, and triketone herbicide chemicals.  
452 Clan 71 CYPs are encoded in large number in the genomes of all land species; there are 150 in *A.*  
453 *thaliana* and 164 in *O. sativa*. In contrast, there are much fewer clan 72 CYPs encoded in land plant  
454 genomes, with 19 in *A. thaliana* and 34 in *O. sativa*. Four clan 72 members shown to confer  
455 resistance to thiobenzoates, pelargonic acid, or sulfonylureas. Thus, all CYPs currently known to  
456 metabolise or confer resistance to herbicides belong to clans 71 and 72, which represent two of the  
457 four expanded CYP clans in land plants.

458 Twelve members of the clan 71 family CYP81 were shown to confer herbicide resistance.  
459 This is more than any other family or clan (Fig 3C). CYP81 enzymes catalyse hydroxylations and N-/O-  
460 demethylations of herbicide substrates [77]. The CYP81 enzymes metabolise herbicides from five  
461 chemical classes, more than any other CYP family to date.

462 Together these data indicate that genes encoding CYP proteins that mutate to herbicide  
463 resistance are members of clan 71 and 72. Within clan 71, more members of the CYP81 family are  
464 associated with herbicide resistance than any other family.

465

## 466 Phi, Tau and Lambda GST class proteins are associated with resistance to 467 herbicides from 9 chemical classes

468 Thirty-three plant GSTs were found in the literature to be active towards one or more herbicides or  
469 that confer herbicide resistance (Fig 3B, S4 Table). These GST proteins were identified in the model  
470 species *Arabidopsis* (*Arabidopsis thaliana*) [96], moss (*P. patens*) [53], the weed species blackgrass  
471 (*Alopecurus myosuroides*) [97,98], the crops maize (*Zea mays*) [99,100,109,101–108], rice (*Oryza*  
472 *sativa*) [99,110,111], sorghum (*Sorghum bicolor*) [112], wheat (*Triticum aestivum*) [29,113–115] and  
473 soybean (*Glycine max*) [116–118]. These GSTs were shown to modify or confer resistance to diverse  
474 chemical classes, with most GSTs (28 of 33) modifying chloroacetanilide herbicides. Of the 33 GSTs,  
475 11 are Phi class members, 21 are Tau class members, and one is a lambda class member (Fig 3B).

476 Twenty-one Tau GSTs were identified in 6 species and catalysed the GSH-conjugation of  
477 chloroacetanilide, diphenyl ether, FOP, sulfonylurea and triazine herbicide chemicals. Eleven Phi  
478 GSTs identified in 6 species catalysed the GSH-conjugation of bipyridylum, chloroacetanilide, DIM,  
479 diphenyl ether, FOP, organophosphorus, phenylurea, sulphonylurea, thiocarbamate and triazine  
480 herbicides (S4 Table).

481 50-70% of all GSTs encoded in vascular plant genomes are Tau or Phi class members. In *A.*  
482 *thaliana*, there are 41 Tau and Phi GSTs and only 20 GSTs across the other 12 classes. In *O. sativa*,  
483 there are 68 Tau and Phi GSTs and 17 in the other classes (Fig 3B). Thus, the overrepresentation of  
484 Phi and Tau class GSTs among those reported to confer herbicide resistance may simply be due to  
485 the fact that there are more genes in these classes than others. Therefore, we cannot reject the  
486 hypothesis that there is an equal probability of GST proteins from any class being able to confer

487 herbicide resistance. The report that overexpression of a single Lambda class GST – there are 3  
488 Lambda class genes encoded in *A. thaliana* – in a naturally occurring herbicide tolerant weed is able  
489 to confer herbicide resistance supports this hypothesis.

490 In conclusion, herbicide resistance has been associated with GST proteins from Tau, Phi and  
491 Lambda classes. The probability of resistance evolving among any of those classes, is likely to be  
492 proportional to the number of genes in each class.

493

## 494 Discussion

495 Cytochrome P450 monooxygenases (CYPs) and glutathione S-transferases (GSTs) are enzymes that  
496 catalyse the chemical modification of a multitude of organic compounds in organisms from all  
497 domains of life. Overexpression of genes encoding CYPs and GSTs has been shown to confer  
498 herbicide resistance in wild weed populations subjected to herbicide selection. To classify the genes  
499 that metabolise herbicides, we carried out a phylogenetic analysis of both the CYP and GST protein  
500 families. By comparing protein sequences of 9 representative species of the Archaeplastida – the  
501 lineage that includes the red algae, glaucophyte algae, chlorophyte algae, and streptophytes – and  
502 generating phylogenetic trees, we identified the CYP and GST protein families that existed in the  
503 common ancestor of the Archaeplastida. Members of two CYP clans (clans 51 and 71) and eleven  
504 GST classes (Ala, Alb, Alc, EF1B-y, GHR, Iota, Metaxin, mPGES2, TCHQD, Theta, and Zeta) existed in  
505 the last common ancestor of the Archaeplastida. Other families evolved during the course of  
506 Archaeplastida evolution. There are more CYP and GST genes in land plants than in algae, even  
507 relative to the total number of genes, consistent with the hypothesis that these gene families  
508 expanded during Archaeplastida evolution. This expansion was largely driven by gene duplications  
509 among CYP clan 71 and 72, and among the GST Phi and Tau classes. Those CYP and GST genes that  
510 confer resistance to herbicides belong almost exclusively to these expanded CYP clans and GST  
511 classes.

512           In the face of intense herbicide use over the past 50 years, herbicide resistance has evolved  
513 through the selection of naturally occurring alleles that contribute to herbicide tolerance. Target site  
514 resistance can evolve as a result of mutations in the gene encoding the herbicide's target, thereby  
515 disrupting the inhibition of the target proteins by the herbicide. Non-target site resistance results  
516 from genetic changes that inhibit access of the active herbicide to its target [1]. Diverse forms of  
517 non-target site resistance have been reported which either chemically modify the herbicide, making  
518 it inactive, or sequester the herbicide to a location where it cannot access the target [2–4].  
519 Overexpression of genes encoding CYPs and GSTs is associated with herbicide resistance in many  
520 weed populations [8–10]. Using phylogenetic trees built from protein sequences from 9  
521 Archaeplastida species, we show that the CYP and GST proteins that confer non-target site herbicide  
522 resistance in natural weed populations belong to the expanded CYP clans 71 and 72 and the GST Phi  
523 and Tau classes.

524           It is unclear why mutation of genes in these CYP clans and GST classes leads to resistance in  
525 weed populations while others do not. It is possible that because these clans and classes are the  
526 largest, there is simply a greater probability of them mutating to resistance. Characterizing the  
527 cause of resistance in more resistant populations will help to resolve this question. It is also possible  
528 that the enzymatic activity of these proteins makes them more likely to metabolize herbicide  
529 compounds. Further characterization of the endogenous function of CYP clans 71 and 72 and GST  
530 Tau and Phi classes during normal plant growth and development will help to answer this question.  
531 At present, the available phylogenetic and enzymatic data do not allow us to distinguish between  
532 these alternative hypotheses.

533           All CYP clans and all but one land plant GST classes that are present in land plants evolved  
534 before the divergence of streptophyte algae and land plants from their last common ancestor. These  
535 results demonstrate that the clan and class diversity in extant plant CYP and GST proteins,  
536 respectively, evolved in the Proterozoic, before the divergence of land plants and streptophyte algae  
537 from a last common ancestor. Then, early in embryophyte evolution during the Palaeozoic,

538 expansion of four of the twelve CYP clans and two of the fourteen GST classes resulted in the large  
539 number of CYP and GST proteins found in extant land plants. It is among these expanded groups that  
540 herbicide resistance genes are found. Thus, resistance depends on the deregulation of the  
541 expression of genes that evolved in the Proterozoic, with original functions unrelated to herbicide  
542 resistance. This is an unusual example of exaptation – whereby traits [or genes] that evolved in  
543 response to one selection pressure – in this case probably metabolic biosynthesis – are selected for  
544 in response to an entirely different selection pressure – here herbicide resistance [119]. Exaptation is  
545 likely to be a general principle underpinning the evolution of herbicide resistance mechanisms  
546 among weeds in the agricultural landscape.

547

548

## 549 Acknowledgements

550 The authors would like to thank Professor David Nelson for the nomenclature of *Marchantia*  
551 *polymorpha* CYPs in this article, and Dr Sandy Hetherington for his input and advice on the methods.

552

## 553 Funding

554 This research was supported by a European Research Council (ERC) Advanced Grants EVO500 project  
555 number 250284 and De Novo-P (project number 787613) to LD from the European Commission. AC  
556 was supported by a British Biological Sciences Research Council (BBSRC) Scholarship through a  
557 doctoral training partnership (BB/XXXX /X). The funders had no role in study design, data collection  
558 and analysis, decision to publish, or preparation of the manuscript.

559



## 560 References

- 561 1. Powles SB, Yu Q. Evolution in action: plants resistant to herbicides. *Annu Rev Plant Biol.*  
562 2010;61(1):317–47.
- 563 2. Ghanizadeh H, Kerry &, Harrington CC. Non-target Site Mechanisms of Resistance to  
564 Herbicides. *CRC Crit Rev Plant Sci.* 2017;36(1):24–34.
- 565 3. Délye C. Unravelling the genetic bases of non-target-site-based resistance (NTSR) to  
566 herbicides: A major challenge for weed science in the forthcoming decade. *Pest Manag Sci.*  
567 2013;69(2):176–87.
- 568 4. Délye C, Duhoux A, Pernin F, Riggins CW, Tranel PJ. Molecular mechanisms of herbicide  
569 resistance. *Weed Sci.* 2015;63(SP1):91–115.
- 570 5. Dixon DP, McEwen AG, Laphorn AJ, Edwards R. Forced evolution of a herbicide detoxifying  
571 glutathione transferase. *J Biol Chem.* 2003 Jul 27;278(26):23930–5.
- 572 6. Reade JPH, Milner LJ, Cobb AH. A role for glutathione-S-transferases in resistance to  
573 herbicides in grasses. *Weed Sci.* 2004 May 2;52(3):468–74.
- 574 7. Yu Q, Powles S. Metabolism-Based Herbicide Resistance and Cross-Resistance in Crop Weeds:  
575 A Threat to Herbicide Sustainability and Global Crop Production. *Plant Physiol.*  
576 2014;166:1106–18.
- 577 8. Yuan JS, Tranel PJ, Stewart CN. Non-target-site herbicide resistance: a family business. *Trends*  
578 *Plant Sci.* 2007 Jan 1;12(1):6–13.
- 579 9. Cummins I, Dixon DP, Freitag-Pohl S, Skipsey M, Edwards R. Multiple roles for plant  
580 glutathione transferases in xenobiotic detoxification. *Drug Metab Rev.* 2011;43(2):266–80.
- 581 10. Dimaano NG, Iwakami S. Cytochrome P450-mediated herbicide metabolism in plants: current  
582 understanding and prospects. *Pest Manag Sci.* 2021 Jan 31;77(1):22–32.
- 583 11. Kumar S, Asif MH, Chakrabarty D, Tripathi RD, Dubey RS, Trivedi PK. Expression of a rice  
584 Lambda class of glutathione S-transferase, OsGSTL2, in Arabidopsis provides tolerance to

- 585 heavy metal and other abiotic stresses. *J Hazard Mater.* 2013 Mar 5;248–249(1):228–37.
- 586 12. Riechers DE, Vaughn KC, Molin WT. The role of plant glutathione S-transferases in herbicide  
587 metabolism. *ACS Symp Ser.* 2005;899:216–32.
- 588 13. Dixon D, Davis B, Edwards R. Functional divergence in the glutathione transferase superfamily  
589 in plants: Identification of two classes with putative functions in redox homeostasis in  
590 *Arabidopsis thaliana*. *J Biol Chem.* 2002 Aug 23;277(34):30859–69.
- 591 14. Gonneau M, Mornet R, Laloue M. A *Nicotiana plumbaginifolia* protein labeled with an azido  
592 cytokinin agonist is a glutathione S-transferase. *Physiol Plant.* 1998 May 1;103(1):114–24.
- 593 15. Zettl R, Schell J, Palme K. Photoaffinity labeling of *Arabidopsis thaliana* plasma membrane  
594 vesicles by 5-azido-[7-3H]indole-3-acetic acid: Identification of a glutathione S- transferase.  
595 *Proc Natl Acad Sci U S A.* 1994;91(2):689–93.
- 596 16. Bilanz J, Sturm A. Cloning and characterization of a glutathione S-transferase that can be  
597 photolabeled with 5-azido-indole-3-acetic acid. *Plant Physiol.* 1995 Sep 1;109(1):253–60.
- 598 17. Dixon DP, Edwards R. Roles for stress-inducible lambda glutathione transferases in flavonoid  
599 metabolism in plants as identified by ligand fishing. *J Biol Chem.* 2010 Nov 19;285(47):36322–  
600 9.
- 601 18. Liu Y, Jiang H, Zhao Y, Li X, Dai X, Zhuang J, et al. Three *Camellia sinensis* glutathione S-  
602 transferases are involved in the storage of anthocyanins, flavonols, and proanthocyanidins.  
603 *Planta.* 2019 Oct 1;250(4):1163–75.
- 604 19. Fernández-Cañón JM, Baetscher MW, Finegold M, Burlingame T, Gibson KM, Grompe M.  
605 Maleylacetoacetate Isomerase (MAAI/GSTZ)-Deficient Mice Reveal a Glutathione-Dependent  
606 Nonenzymatic Bypass in Tyrosine Catabolism. *Mol Cell Biol.* 2002 Jul 1;22(13):4943–51.
- 607 20. Kampranis SC, Damianova R, Atallah M, Toby G, Kondi G, Tschlis PN, et al. A novel plant  
608 glutathione S-transferase/peroxidase suppresses Bax lethality in yeast. *J Biol Chem.* 2000 Sep  
609 22;275(38):29207–16.
- 610 21. Edwards R, Dixon DP, Walbot V. Plant glutathione S-transferases: enzymes with multiple

- 611 functions in sickness and in health. *Trends Plant Sci.* 2000 May 1;5(5):193–8.
- 612 22. Mizutani M, Sato F. Unusual P450 reactions in plant secondary metabolism. Vol. 507, *Archives*  
613 *of Biochemistry and Biophysics*. Academic Press Inc.; 2011. p. 194–203.
- 614 23. Wakabayashi T, Hamana M, Mori A, Akiyama R, Ueno K, Osakabe K, et al. Direct conversion of  
615 carlactonoic acid to orobanchol by cytochrome P450 CYP722C in strigolactone biosynthesis.  
616 *Sci Adv.* 2019 Dec 18;5(12):9067–85.
- 617 24. Mizutani M, Ohta D. Diversification of P450 genes during land plant evolution. *Annu Rev Plant*  
618 *Biol.* 2010 Jun 2;61:291–315.
- 619 25. Rupasinghe S, Schuler MA. Homology modeling of plant cytochrome P450s. Vol. 5,  
620 *Phytochemistry Reviews*. Springer; 2006. p. 473–505.
- 621 26. Hasemann CA, Kurumbail RG, Boddupalli SS, Peterson JA, Deisenhofer J. Structure and  
622 function of cytochromes P450: a comparative analysis of three crystal structures. *Structure*.  
623 1995 Jan 1;3(1):41–62.
- 624 27. Neuefeind T, Huber R, Reinemer P, Knäblein J, Prade L, Mann K, et al. Cloning, sequencing,  
625 crystallization and x-ray structure of glutathione S-transferase-III from *Zea mays* var. *mutin*: A  
626 leading enzyme in detoxification of maize herbicides. *J Mol Biol.* 1997 Dec 12;274(4):577–87.
- 627 28. Reinemer P, Prade L, Hof P, Neuefeind T, Huber R, Zettl R, et al. Three-dimensional structure  
628 of glutathione S-transferase from *Arabidopsis thaliana* at 2.2 Å resolution: Structural  
629 characterization of herbicide-conjugating plant glutathione S-transferases and a novel active  
630 site architecture. *J Mol Biol.* 1996;255(2):289–309.
- 631 29. Thom R, Cummins I, Dixon DP, Edwards R, Cole DJ, Laphorn AJ. Structure of a Tau Class  
632 Glutathione S-Transferase from Wheat Active in Herbicide Detoxification. *Biochemistry*.  
633 2002;41:7008–20.
- 634 30. Neuefeind T, Huber R, Dasenbrock H, Prade L, Bieseler B. Crystal structure of herbicide-  
635 detoxifying maize glutathione S-transferase-I in complex with lactoylglutathione: Evidence for  
636 an induced-fit mechanism. Vol. 274, *Journal of Molecular Biology*. Academic Press; 1997. p.

- 637 446–53.
- 638 31. Hansen CC, Nelson DR, Møller BL, Werck-Reichhart D. Plant cytochrome P450 plasticity and  
639 evolution. *Mol Plant*. 2021 Aug 2;14(8):1244–65.
- 640 32. Nelson DR. Plant cytochrome P450s from moss to poplar. Vol. 5, *Phytochemistry Reviews*.  
641 Springer; 2006. p. 193–204.
- 642 33. Nelson DR. Cytochrome P450 diversity in the tree of life. *Biochim Biophys Acta - Proteins  
643 Proteomics*. 2018 Jan 1;1866(1):141–54.
- 644 34. Nelson D, Koymans L, Kamataki T, Stegeman JJ, Feyereisen R, Waxman DJ, et al. P450  
645 superfamily: update on new sequences, gene mapping, accession numbers and  
646 nomenclature. *Pharmacogenetics*. 1996 Feb;6(1):1–42.
- 647 35. Su D, Yang L, Shi X, Ma X, Zhou X, Hedges SB, et al. Large-Scale Phylogenomic Analyses Reveal  
648 the Monophyly of Bryophytes and Neoproterozoic Origin of Land Plants. *Mol Biol Evol*. 2021  
649 Aug 1;38(8):3332.
- 650 36. Nie Y, Foster CSP, Zhu T, Yao R, Duchêne DA, Ho SYW, et al. Accounting for Uncertainty in the  
651 Evolutionary Timescale of Green Plants Through Clock-Partitioning and Fossil Calibration  
652 Strategies. *Syst Biol*. 2020 Jan 1;69(1):1–16.
- 653 37. Morris JL, Puttick MN, Clark JW, Edwards D, Kenrick P, Pressel S, et al. The timescale of early  
654 land plant evolution. *Proc Natl Acad Sci U S A*. 2018 Mar 6;115(10):E2274–83.
- 655 38. Huala E, Dickerman AW, Garcia-Hernandez M, Weems D, Reiser L, LaFond F, et al. The  
656 *Arabidopsis* Information Resource (TAIR): A comprehensive database and web-based  
657 information retrieval, analysis, and visualization system for a model plant. *Nucleic Acids Res*.  
658 2001 Jan 1;29(1):102–5.
- 659 39. Kawahara Y, de la Bastide M, Hamilton JP, Kanamori H, McCombie WR, Ouyang S, et al.  
660 Improvement of the *oryza sativa nipponbare* reference genome using next generation  
661 sequence and optical map data. *Rice*. 2013 Feb 6;6(1):3–10.
- 662 40. Li F-W, Nishiyama T, Waller M, Frangedakis E, Keller J, Li Z, et al. *Anthoceros* genomes

- 663 illuminate the origin of land plants and the unique biology of hornworts. *Nat Plants*. 2020  
664 Mar 13;6(3):259–72.
- 665 41. Hori K, Maruyama F, Fujisawa T, Togashi T, Yamamoto N, Seo M, et al. *Klebsormidium*  
666 *flaccidum* genome reveals primary factors for plant terrestrial adaptation. *Nat Commun*. 2014  
667 May 28;5.
- 668 42. Goodstein DM, Shu S, Howson R, Neupane R, Hayes RD, Fazo J, et al. Phytozome: A  
669 comparative platform for green plant genomics. *Nucleic Acids Res*. 2012 Jan 1;40(D1):D1178–  
670 86.
- 671 43. Matsuzaki M, Misumi O, Shin-I T, Maruyama S, Takahara M, Miyagishima SY, et al. Genome  
672 sequence of the ultrasmall unicellular red alga *Cyanidioschyzon merolae* 10D. *Nature*. 2004  
673 Apr 8;428(6983):653–7.
- 674 44. Nelson DR. The cytochrome P450 homepage. *Hum Genomics*. 2009 Oct 1;4(1):59–65.
- 675 45. Paquette SM, Bak S, Feyereisen R. Intron–exon organization and phylogeny in a large  
676 superfamily, the paralogous cytochrome P450 genes of *Arabidopsis thaliana*. *DNA Cell Biol*.  
677 2000;19(5):307–17.
- 678 46. Ehlting J, Sauveplane V, Olry A, Ginglinger JF, Provart NJ, Werck-Reichhart D. An extensive  
679 (co-)expression analysis tool for the cytochrome P450 superfamily in *Arabidopsis thaliana*.  
680 *BMC Plant Biol*. 2008 Apr 23;8(1):47.
- 681 47. Nelson D, Schuler M, Paquette SM, Werck-Reichhart D, Bak S. Comparative Genomics of Rice  
682 and *Arabidopsis*. Analysis of 727 Cytochrome P450 Genes and Pseudogenes from a Monocot  
683 and a Dicot. *Plant Physiol*. 2004;135:756–72.
- 684 48. Rice Cyt P450 Database [Internet]. 2015. Available from:  
685 <https://ricephylogenomics.ucdavis.edu/p450/genInfo.shtml>
- 686 49. Wagner U, Edwards R, Dixon DP, Mauch F. Probing the Diversity of the *Arabidopsis*  
687 glutathione S-Transferase Gene Family. Vol. 49, *Plant Molecular Biology*. 2002.
- 688 50. Dixon DP, Edwards R. Glutathione Transferases. *Arab B*. 2010 Jan;8:e0131.

- 689 51. Soranzo N, Sari Gorla M, Mizzi L, De Toma G, Frova C. Organisation and structural evolution of  
690 the rice glutathione S-transferase gene family. Vol. 271, *Molecular Genetics and Genomics*.  
691 2004. p. 511–21.
- 692 52. Jain M, Ghanashyam C, Bhattacharjee A. Comprehensive expression analysis suggests  
693 overlapping and specific roles of rice glutathione S-transferase genes during development  
694 and stress responses. *BMC Genomics*. 2010 Jan 29;11(1):73.
- 695 53. Liu Y-J, Han X-M, Ren L-L, Yang H-L, Zeng Q-Y. Functional Divergence of the Glutathione S-  
696 Transferase Supergene Family in *Physcomitrella patens* Reveals Complex Patterns of Large  
697 Gene Family Evolution in Land Plants. *Plant Physiol*. 2013 Feb 1;161(2):773–86.
- 698 54. Blum M, Chang HY, Chuguransky S, Grego T, Kandasaamy S, Mitchell A, et al. The InterPro  
699 protein families and domains database: 20 years on. *Nucleic Acids Res*. 2021 Jan  
700 8;49(D1):D344–54.
- 701 55. Katoh K, Standley DM. MAFFT Multiple Sequence Alignment Software Version 7:  
702 Improvements in Performance and Usability. *Mol Biol Evol*. 2013;30:772–80.
- 703 56. Hall TA. BioEdit: a user-friendly biological sequence alignment editor and analysis program for  
704 windows 95/98/NT. *Nucleic Acids Symp Ser*. 1999;41:95–8.
- 705 57. Capella-Gutiérrez S, Silla-Martínez JM, Gabaldón T. trimAl: a tool for automated alignment  
706 trimming in large-scale phylogenetic analyses. *Bioinforma Appl NOTE*. 2009;25(15):1972–3.
- 707 58. Guindon S, Ois Dufayard J-F, Lefort V, Anisimova M, Hordijk W, Gascuel O. New Algorithms  
708 and Methods to Estimate Maximum-Likelihood Phylogenies: Assessing the Performance of  
709 PhyML 3.0. *Syst Biol*. 2010;59(3):307–21.
- 710 59. FigTree [Internet]. 2022. Available from: <http://tree.bio.ed.ac.uk/software/figtree/>
- 711 60. Inkscape. Inkscape Project [Internet]. 2022. Available from: <https://inkscape.org>
- 712 61. Kaul S, Koo HL, Jenkins J, Rizzo M, Rooney T, Tallon LJ, et al. Analysis of the genome sequence  
713 of the flowering plant *Arabidopsis thaliana*. *Nature*. 2000 Dec 14;408(6814):796–815.
- 714 62. Banks JA, Nishiyama T, Hasebe M, Bowman JL, Gribskov M, DePamphilis C, et al. The

- 715           selaginella genome identifies genetic changes associated with the evolution of vascular  
716           plants. *Science* (80- ). 2011 May 20;332(6032):960–3.
- 717   63.   Rensing SA, Lang D, Zimmer AD, Terry A, Salamov A, Shapiro H, et al. The *Physcomitrella*  
718           genome reveals evolutionary insights into the conquest of land by plants. *Science* (80- ). 2008  
719           Jan 4;319(5859):64–9.
- 720   64.   Bowman JL, Kohchi T, Yamato KT, Jenkins J, Shu S, Ishizaki K, et al. Insights into Land Plant  
721           Evolution Garnered from the *Marchantia polymorpha* Genome. *Cell*. 2017 Oct 5;171(2):287-  
722           304.e15.
- 723   65.   Merchant SS, Prochnik SE, Vallon O, Harris EH, Karpowicz SJ, Witman GB, et al. The  
724           Chlamydomonas genome reveals the evolution of key animal and plant functions. *Science*  
725           (80- ). 2007 Oct 12;318(5848):245–51.
- 726   66.   Nelson D, Werck-Reichhart D. A P450-centric view of plant evolution. *Plant J*. 2011  
727           Apr;66(1):194–211.
- 728   67.   Board PG, Baker RT, Chelvanayagam G, Jermiin LS. Zeta, a novel class of glutathione  
729           transferases in a range of species from plants to humans. *Biochem J*. 1997 Dec  
730           15;328(3):929–35.
- 731   68.   Koonin E V., Tatusov RL, Altschul SF, Bryant SH, Mushegian AR, Bork P, et al. Eukaryotic  
732           translation elongation factor 1 $\gamma$  contains a glutathione transferase domain-Study of a diverse,  
733           ancient protein super family using motif search and structural modeling. *Protein Sci*. 1994  
734           Nov 1;3(11):2045–55.
- 735   69.   Lallement P-A, Meux E, Gualberto JM, Dumarcay S, Favier F, Didierjean C, et al. Glutathionyl-  
736           hydroquinone reductases from poplar are plastidial proteins that deglutathionylate both  
737           reduced and oxidized glutathionylated quinones. *FEBS Lett*. 2015 Jan 2;589(1):37–44.
- 738   70.   Lister R, Carrie C, Duncan O, Ho LHM, Howell KA, Murcha MW, et al. Functional Definition of  
739           Outer Membrane Proteins Involved in Preprotein Import into Mitochondria. *Plant Cell*.  
740           2007;19:3739–59.

- 741 71. Yamada T, Komoto J, Watanabe K, Ohmiya Y, Takusagawa F. Crystal structure and possible  
742 catalytic mechanism of microsomal prostaglandin E synthase type 2 (mPGES-2). *J Mol Biol.*  
743 2005 May 20;348(5):1163–76.
- 744 72. Lallement PA, Brouwer B, Keech O, Hecker A, Rouhier N. The still mysterious roles of cysteine-  
745 containing glutathione transferases in plants. Vol. 5 AUG, *Frontiers in Pharmacology.*  
746 *Frontiers Research Foundation*; 2014. p. 192.
- 747 73. Batard Y, LeRet M, Schalk M, Robineau T, Durst F, Werck-Reichhart D. Molecular cloning and  
748 functional expression in yeast of CYP76B1, a xenobiotic-inducible 7-ethoxycoumarin *O*  
749 -de-ethylase from *Helianthus tuberosus*. *Plant J.* 1998 Apr 5;14(1):111–20.
- 750 74. Gaines TA, Lorentz L, Figge A, Herrmann J, Maiwald F, Ott M-C, et al. RNA-Seq transcriptome  
751 analysis to identify genes involved in metabolism-based diclofop resistance in *Lolium rigidum*.  
752 *Plant J.* 2014 Jun;78(5):865–76.
- 753 75. Hayashi E, Fuzimoto K, Imaishi H. Expression of Arabidopsis thaliana cytochrome P450  
754 monooxygenase, CYP71A12, in yeast catalyzes the metabolism of herbicide pyrazoxyfen.  
755 *Plant Biotechnol.* 2007;24(4):393–6.
- 756 76. Höfer R, Boachon B, Renault H, Gavira C, Miesch L, Iglesias J, et al. Dual function of the  
757 cytochrome p450 cyp76 family from arabidopsis thaliana in the metabolism of  
758 monoterpenols and phenylurea herbicides. *Plant Physiol.* 2014 Nov 1;166(3):1149–61.
- 759 77. Dimaano NG, Yamaguchi T, Fukunishi K, Tominaga T, Iwakami S. Functional characterization  
760 of cytochrome P450 CYP81A subfamily to disclose the pattern of cross-resistance in  
761 *Echinochloa phyllopogon*. *Plant Mol Biol.* 2020 Mar 1;102(4–5):403–16.
- 762 78. Guo F, Iwakami S, Yamaguchi T, Uchino A, Sunohara Y, Matsumoto H. Role of CYP81A  
763 cytochrome P450s in clomazone metabolism in *Echinochloa phyllopogon*. *Plant Sci.* 2019 Jun  
764 1;283:321–8.
- 765 79. Iwakami S, Endo M, Saika H, Okuno J, Nakamura N, Yokoyama M, et al. Cytochrome P450  
766 CYP81A12 and CYP81A21 are associated with resistance to two acetolactate synthase



- 767 inhibitors in *Echinochloa phyllopogon*. *Plant Physiol.* 2014 Jun 1;165(2):618–29.
- 768 80. Zhao N, Yan Y, Liu W, Wang J. Cytochrome P450 CYP709C56 metabolizing mesosulfuron-  
769 methyl confers herbicide resistance in *Alopecurus aequalis*. *Cell Mol Life Sci.* 2022 Apr  
770 1;79(4):1–14.
- 771 81. Han H, Yu Q, Beffa R, González S, Maiwald F, Wang J, et al. Cytochrome P450 CYP81A10v7 in  
772 *Lolium rigidum* confers metabolic resistance to herbicides across at least five modes of  
773 action. *Plant J.* 2021 Jan 27;105(1):79–92.
- 774 82. Gesell A, Blaukopf M, Madilao L, Yuen MMS, Withers SG, Mattsson J, et al. The gymnosperm  
775 cytochrome P450 CYP750B1 catalyzes stereospecific monoterpene hydroxylation of (+)-  
776 sabinene in thujone biosynthesis in western redcedar. *Plant Physiol.* 2015;168(1):94–106.
- 777 83. Iwakami S, Kamidate Y, Yamaguchi T, Ishizaka M, Endo M, Suda H, et al. CYP81A P450s are  
778 involved in concomitant cross-resistance to acetolactate synthase and acetyl-CoA carboxylase  
779 herbicides in *Echinochloa phyllopogon*. *New Phytol.* 2019 Mar 1;221(4):2112–22.
- 780 84. Imaishi H, Matumoto S. Isolation and functional characterization in yeast of CYP72A18, a rice  
781 cytochrome P450 that catalyzes ( $\omega$ -1)-hydroxylation of the herbicide pelargonic acid. *Pestic  
782 Biochem Physiol.* 2007 May 1;88(1):71–7.
- 783 85. Saika H, Horita J, Taguchi-Shiobara F, Nonaka S, Nishizawa-Yokoi A, Iwakami S, et al. A novel  
784 rice cytochrome P450 gene, CYP72A31, confers tolerance to acetolactate synthase-inhibiting  
785 herbicides in rice and *Arabidopsis*. *Plant Physiol.* 2014 Nov;166(3):1232–40.
- 786 86. Zhang L, Lu Q, Chen H, Pan G, Xiao S, Dai Y, et al. Identification of a cytochrome P450  
787 hydroxylase, CYP81A6, as the candidate for the bentazon and sulfonyleurea herbicide  
788 resistance gene, Bel, in rice. *Mol Breed.* 2006 Dec 27;19(1):59–68.
- 789 87. Xiang W, Wang X, Ren T. Expression of a wheat cytochrome P450 monooxygenase cDNA in  
790 yeast catalyzes the metabolism of sulfonyleurea herbicides. *Pestic Biochem Physiol.*  
791 2005;85(1):1–6.
- 792 88. Li J, Yu H, Zhang F, Lin C, Gao J, Fang J, et al. A Built-In Strategy to Mitigate Transgene

- 793 Spreading from Genetically Modified Corn. Alvarez ML, editor. PLoS One. 2013 Dec  
794 6;8(12):e81645.
- 795 89. Thyssen GN, Naoumkina M, McCarty JC, Jenkins JN, Florane C, Li P, et al. The P450 gene  
796 CYP749A16 is required for tolerance to the sulfonylurea herbicide trifloxysulfuron sodium in  
797 cotton (*Gossypium hirsutum* L.). BMC Plant Biol. 2018 Dec 10;18(1):186.
- 798 90. Kato S, Yokota Y, Suzuki R, Fujisawa Y, Sayama T, Kaga A, et al. Identification of a cytochrome  
799 P450 hydroxylase, CYP81E22, as a causative gene for the high sensitivity of soybean to  
800 herbicide bentazon. Theor Appl Genet. 2020 Jul 1;133(7):2105–15.
- 801 91. Siminszky B, Corbin FT, Ward ER, Fleischmann TJ, Dewey RE. Expression of a soybean  
802 cytochrome P450 monooxygenase cDNA in yeast and tobacco enhances the metabolism of  
803 phenylurea herbicides. Proc Natl Acad Sci U S A. 1999 Feb 16;96(4):1750–5.
- 804 92. Khanom S, Jang J, Lee OR. Overexpression of ginseng cytochrome P450 CYP736A12 alters  
805 plant growth and confers phenylurea herbicide tolerance in Arabidopsis. J Ginseng Res. 2019  
806 Oct 1;43(4):645–53.
- 807 93. Robineau T, Batard Y, Nedelkina S, Cabello-Hurtado F, LeRet M, Sorokine O, et al. The  
808 chemically inducible plant cytochrome P450 CYP76B1 actively metabolizes phenylureas and  
809 other xenobiotics. Plant Physiol. 1998 Nov 1;118(3):1049–56.
- 810 94. Pierrel MA, Batard Y, Kazmaier M, Mignotte-Vieux C, Durst F, Werck-Reichhart D. Catalytic  
811 Properties of the Plant Cytochrome P450 CYP73 Expressed in Yeast. Substrate Specificity of a  
812 Cinnamate Hydroxylase. Eur J Biochem. 1994 Sep 1;224(3):835–44.
- 813 95. Yamada T, Kambara Y, Imaishi H, Ohkawa H. Molecular cloning of novel cytochrome P450  
814 species induced by chemical treatments in cultured tobacco cells. Pestic Biochem Physiol.  
815 2000 Sep 1;68(1):11–25.
- 816 96. Deridder BP, Dixon DP, Beussman DJ, Edwards R, Goldsbrough PB. Induction of Glutathione S-  
817 Transferases in Arabidopsis by Herbicide Safeners. Plant Physiol. 2002;130:1497–505.
- 818 97. Cummins I, Cole DJ, Edwards R. A role for glutathione transferases functioning as glutathione

- 819 peroxidases in resistance to multiple herbicides in blackgrass. *Plant J.* 1999 May 1;18(3):285–  
820 92.
- 821 98. Cummins I, Wortley DJ, Sabbadin F, He Z, Coxon CR, Straker HE, et al. Key role for a  
822 glutathione transferase in multiple-herbicide resistance in grass weeds. *Proc Natl Acad Sci.*  
823 2013;110(15).
- 824 99. Cho HY, Kong KH. Molecular cloning, expression, and characterization of a phi-type  
825 glutathione S-transferase from *Oryza sativa*. *Pestic Biochem Physiol.* 2005 Sep 1;83(1):29–36.
- 826 100. Karavangeli M, Labrou NE, Clonis YD, Tsaftaris A. Development of transgenic tobacco plants  
827 overexpressing maize glutathione S-transferase I for chloroacetanilide herbicides  
828 phytoremediation. *Biomol Eng.* 2005 Oct 1;22(4):121–8.
- 829 101. Mozer TJ, Tiemeier DC, Jaworski EG. Purification and characterization of corn glutathione S-  
830 transferase. *Biochemistry.* 1983;22(5):1068–72.
- 831 102. Shah DM, Hironaka CM, Wiegand RC, Harding EI, Krivi GG, Tiemeier DC. Structural analysis of  
832 a maize gene coding for glutathione-S-transferase involved in herbicide detoxification. *Plant*  
833 *Mol Biol.* 1986;6:203–11.
- 834 103. Dixon D, Cole DJ, Edwards R. Characterisation of Multiple Glutathione Transferases  
835 Containing the GST I Subunit with Activities toward Herbicide Substrates in Maize (*Zea mays*).  
836 *Pestic Sci.* 1997 May 1;50(1):72–82.
- 837 104. Fuerst EP, Irzyk GP, Miller KD, Townson J, Edwards R. Partial characterization of glutathione S-  
838 transferase isozymes induced by the herbicide safener benoxacor in maize. *Plant Physiol.*  
839 1993 Jul 1;102(3):795–802.
- 840 105. Milligan AS, Daly A, Parry MAJ, Lazzeri PA, Jepson I. The expression of a maize glutathione S-  
841 transferase gene in transgenic wheat confers herbicide tolerance, both in planta and in vitro.  
842 *Mol Breed.* 2001;7(4):301–15.
- 843 106. Sommer A, Böger P. Characterization of recombinant corn glutathione S-transferase isoforms  
844 I, II, III, and IV. *Pestic Biochem Physiol.* 1999 Mar 1;63(3):127–38.

- 845 107. Irzyk GP, Fuerst EP. Purification and characterization of a glutathione S-transferase from  
846 benoxacor-treated maize (*Zea mays*). *Plant Physiol.* 1993 Jul 1;102(3):803–10.
- 847 108. David P. Dixon, Cole DJ, Edwards R. Purification, regulation and cloning of a glutathione  
848 transferase (GST) from maize resembling the auxin-inducible type-III GSTs. Vol. 36, *Plant*  
849 *Molecular Biology*. 1998.
- 850 109. Dixon DP, Cole DJ, Edwards R. Dimerisation of maize glutathione transferases in recombinant  
851 bacteria. *Plant Mol Biol.* 1999 Aug;40(6):997–1008.
- 852 110. Hu T, Qv X, Xiao G, Huang X. Enhanced tolerance to herbicide of rice plants by over-  
853 expression of a glutathione S-transferase. *Mol Breed.* 2009 Nov 20;24(4):409–18.
- 854 111. Jo HJ, Lee JJ, Kong KH. A plant-specific tau class glutathione S-transferase from *Oryza sativa*  
855 with very high activity against 1-chloro-2,4-dinitrobenzene and chloroacetanilide herbicides.  
856 *Pestic Biochem Physiol.* 2011 Nov 1;101(3):265–9.
- 857 112. Gronwald JW, Plaisance KL. Isolation and characterization of glutathione S-transferase  
858 isozymes from sorghum. *Plant Physiol.* 1998 Jul 1;117(3):877–92.
- 859 113. Cummins I, Cole DJ, Edwards R. Purification of Multiple Glutathione Transferases Involved in  
860 Herbicide Detoxification from Wheat (*Triticum aestivum* L.) Treated with the Safener  
861 Fenchlorazole-ethyl. *Pestic Biochem Physiol.* 1997;59:35–49.
- 862 114. Cummins I, O’Hagan D, Jablonkai I, Cole DJ, Hehn A, Werck-Reichhart D, et al. Cloning,  
863 characterization and regulation of a family of phi class glutathione transferases from wheat.  
864 *Plant Mol Biol.* 2003 Jun;52(3):591–603.
- 865 115. Pascal S, Scalla R. Purification and characterization of a safener-induced glutathione S-  
866 transferase from wheat (*Triticum aestivum*). *Physiol Plant.* 1999 May 1;106(1):17–27.
- 867 116. Benekos K, Kissoudis C, Nianiou-Obeidat I, Labrou N, Madesis P, Kalamaki M, et al.  
868 Overexpression of a specific soybean GmGSTU4 isoenzyme improves diphenyl ether and  
869 chloroacetanilide herbicide tolerance of transgenic tobacco plants. *J Biotechnol.* 2010 Oct  
870 1;150(1):195–201.

- 871 117. McGonigle B, Keeler SJ, Lau SMC, Koeppe MK, O’Keefe DP. A genomics approach to the  
872 comprehensive analysis of the glutathione S-transferase gene family in soybean and maize.  
873 Plant Physiol. 2000 Nov 1;124(3):1105–20.
- 874 118. Skipsey M, Cummins I, Andrews CJ, Jepson I, Edwards R. Manipulation of plant tolerance to  
875 herbicides through co-ordinated metabolic engineering of a detoxifying glutathione  
876 transferase and thiol cosubstrate. Plant Biotechnol J. 2005 Jul 1;3(4):409–20.
- 877 119. Gould SJ, Vrba ES. Exaptation—a missing term in the science of form. Paleobiology.  
878 1982;8(1):4–15.
- 879 120. Werck-Reichhart D, Feyereisen R. Cytochromes P450: a success story. Vol. 1, Genome  
880 Biology. BioMed Central; 2000. p. 1–9.
- 881 121. Pégeot H, Koh CS, Petre B, Mathiot S, Duplessis S, Hecker A, et al. The poplar Phi class  
882 glutathione transferase: expression, activity and structure of GSTF1. Front Plant Sci. 2014 Dec  
883 23;5:712.
- 884 122. Lee JJ, Jo HJ, Kong KH. A plant-specific tau class glutathione s-transferase from *Oryza sativa*  
885 having significant detoxification activity towards chloroacetanilide herbicides. Bull Korean  
886 Chem Soc. 2011 Oct 20;32(10):3756–9.
- 887 123. Gardin JAC, Gouzy J, Carrère S, Délye C. ALOMYbase, a resource to investigate non-target-  
888 site-based resistance to herbicides inhibiting acetolactate-synthase (ALS) in the major grass  
889 weed *Alopecurus myosuroides* (black-grass). BMC Genomics. 2015;16(590).
- 890 124. Piasecki C, Yang Y, Benemann DP, Kremer FS, Galli V, Millwood RJ, et al. Transcriptomic  
891 analysis identifies new non-target site glyphosate-resistance genes in *Conyza bonariensis*.  
892 Plants. 2019 Jun 7;8(6):157.
- 893 125. Liu XM, Xu X, Li BH, Yao XX, Zhang HH, Wang GQ, et al. Genomic and transcriptomic insights  
894 into cytochrome P450 monooxygenase genes involved in nicosulfuron tolerance in maize (*Zea*  
895 *mays* L.). J Integr Agric. 2018 Aug 1;17(8):1790–9.
- 896 126. Bai S, Zhao Y, Zhou Y, Wang M, Li Y, Luo X, et al. Identification and expression of main genes

- 897 involved in non-target site resistance mechanisms to fenoxaprop-p-ethyl in *Beckmannia*  
898 *syzigachne*. Pest Manag Sci. 2020 Aug 12;76(8):2619–26.
- 899 127. Iwakami S, Uchino A, Kataoka Y, Shibaike H, Watanabe H, Inamura T. Cytochrome P450 genes  
900 induced by bispyribac-sodium treatment in a multiple-herbicide-resistant biotype of  
901 *Echinochloa phyllopogon*. Pest Manag Sci. 2014 Apr 1;70(4):549–58.
- 902 128. Bai S, Liu W, Wang H, Zhao N, Jia S, Zou N, et al. Enhanced herbicide metabolism and  
903 metabolic resistance genes identified in tribenuron-methyl resistant *Myosoton aquaticum* L. J  
904 Agric Food Chem. 2018;66:9850–7.
- 905 129. Liu W, Bai S, Zhao N, Jia S, Li W, Zhang L, et al. Non-target site-based resistance to tribenuron-  
906 methyl and essential involved genes in *Myosoton aquaticum* (L.). BMC Plant Biol. 2018 Oct  
907 11;18(1):225.
- 908 130. Franco-Ortega S, Goldberg-Cavalleri A, Walker A, Brazier-Hicks M, Onkokesung N, Edwards R.  
909 Non-target site herbicide resistance is conferred by two distinct mechanisms in black-grass  
910 (*Alopecurus myosuroides*). Front Plant Sci. 2021 Mar 3;12:636652.
- 911 131. Duhoux A, Carrère S, Duhoux A, Délye C. Transcriptional markers enable identification of rye-  
912 grass (*Lolium* sp.) plants with non-target-site-based resistance to herbicides inhibiting  
913 acetolactate-synthase. Plant Sci. 2017 Apr 1;257:22–36.
- 914 132. Leslie T, Baucom RS. De novo assembly and annotation of the transcriptome of the  
915 agricultural weed *Ipomoea purpurea* uncovers gene expression changes associated with  
916 herbicide resistance. G3 Genes, Genomes, Genet. 2014 Oct 1;4(10):2035–47.
- 917 133. Salas-Perez RA, Saski CA, Noorai RE, Srivastava SK, Lawton-Rauh AL, Nichols RL, et al. RNA-Seq  
918 transcriptome analysis of *Amaranthus palmeri* with differential tolerance to glufosinate  
919 herbicide. PLoS One. 2018;13:1–33.
- 920 134. Matzrafi M, Shaar-Moshe L, Rubin B, Peleg Z. Unraveling the Transcriptional Basis of  
921 Temperature-Dependent Pinoxaden Resistance in *Brachypodium hybridum*. Front Plant Sci.  
922 2017 Jun 21;8:1064.

- 923 135. Pan L, Gao H, Xia W, Zhang T, Dong L. Establishing a herbicide-metabolizing enzyme library in  
924 *Beckmannia syzigachne* to identify genes associated with metabolic resistance. J Exp Bot.  
925 2016 Mar 1;67(6):1745–57.
- 926 136. Wang J, Chen J, Li X, Cui H. RNA-Seq transcriptome analysis to identify candidate genes  
927 involved in non-target site-based mesosulfuron-methyl resistance in *Beckmannia syzigachne*.  
928 Pestic Biochem Physiol. 2021 Jan 1;171:104738.
- 929 137. Zhao N, Li W, Bai S, Guo W, Yuan G, Wang F, et al. Transcriptome profiling to identify genes  
930 involved in mesosulfuron-methyl resistance in *Alopecurus aequalis*. Front Plant Sci. 2017 Aug  
931 9;8:1391.
- 932 138. Yang Q, Deng W, Li X, Yu Q, Bai L, Zheng M. Target-site and non-target-site based resistance  
933 to the herbicide tribenuron-methyl in flixweed (*Descurainia sophia* L.). BMC Genomics.  
934 2016;17(1):17:551.
- 935 139. Taylor VL, Cummins I, Brazier-Hicks M, Edwards R. Protective responses induced by herbicide  
936 safeners in wheat. Environ Exp Bot. 2013 Apr;88:93–9.
- 937 140. Li D, Gao Q, Xu L, Pang S, Liu Z, Wang C, et al. Characterization of glutathione S-transferases in  
938 the detoxification of metolachlor in two maize cultivars of differing herbicide tolerance.  
939 Pestic Biochem Physiol. 2016;143:265–71.
- 940 141. Tétard-Jones C, Sabbadin F, Moss S, Hull R, Neve P, Edwards R. Changes in the proteome of  
941 the problem weed blackgrass correlating with multiple-herbicide resistance. Plant J. 2018  
942 May 1;94(4):709–20.
- 943 142. Wu J, Cramer CL, Hatzios KK. Characterization of two cDNAs encoding glutathione S-  
944 transferases in rice and induction of their transcripts by the herbicide safener fenclorim.  
945 Physiol Plant. 2002 Jan 4;105(1):102–8.
- 946 143. Li D, Xu L, Pang S, Liu Z, Wang K, Wang C. Variable levels of Glutathione S-Transferases are  
947 responsible for the differential tolerance to metolachlor between Maize (*Zea mays*) shoots &  
948 roots. J Agric Food Chem. 2017 Jan 11;65(1):39–44.

949 144. Li G, Wu SG, Yu RX, Cang T, Chen LP, Zhao XP, et al. Identification and expression pattern of a  
950 glutathione S-transferase in *Echinochloa crus-galli*. Zwerger P, editor. Weed Res. 2013 Oct  
951 1;53(5):314–21.

952

953

954

955

956

## 957 Supporting information

958

959 **S1 Fig. Overview of cytochrome P450 protein features in plants.** Diagram of a typical CYP protein  
960 showing recognisable amino acid sites. Adapted from Werck-Reichhart & Feyereisen, 2000.

961 Weblogos of the four conserved CYP amino acid motifs in plants are shown.

962

963 **S2 Fig. Plant CYP and GST phylogenetic analysis using automatic and manual trimming approaches.**

964 Unrooted cladograms of maximum likelihood (ML) analysis conducted by PHYML 3.0 [58] using an  
965 estimated gamma distribution parameter, the LG+G+F model of amino acid substitution and a Chi<sup>2</sup>-

966 based approximate likelihood ratio (aLRT) test. CYP (A) and GST (B) sequences were aligned in

967 MAFFT and trimmed with the automatic trimming software trimAl using the automatic modes -

968 strictplus, -strict, -gappyout or by manual trimming. Branches are coloured to show the different

969 CYP clans or GST classes. aLRT Support values for some of the clades are shown for comparison.

970

971 **S1 Table. Cytochrome P450 clans and gene numbers in green plants and red algae.** Numbers of CYP

972 proteins in each clan, excluding pseudogenes. *At*, *Arabidopsis thaliana*; *Os*, *Oryza sativa*; *Sm*,

973 *Selaginella moellendorffii*; *Aa*, *Anthoceros agrestis*; *Pp*, *Physcomitrium patens*; *Mp*, *Marchantia*



974 *polymorpha*; *Kn*, *Klebsormidium nitens*; *Cr*, *Chlamydomonas reinhardtii*; *Cm*, *Cyanidioschyzon*

975 *merolae*.

976

977 **S2 Table. Glutathione-S-transferase classes and gene numbers in green plants and red algae.**

978 Numbers of GST proteins in each clan, excluding pseudogenes. *At*, *Arabidopsis thaliana*; *Os*, *Oryza*

979 *sativa*; *Sm*, *Selaginella moellendorffii*; *Aa*, *Anthoceros agrestis*; *Pp*, *Physcomitrium patens*; *Mp*,

980 *Marchantia polymorpha*; *Kn*, *Klebsormidium nitens*; *Cr*, *Chlamydomonas reinhardtii*; *Cm*,

981 *Cyanidioschyzon merolae*.

982

983 **S3 Table. Plant CYPs that metabolise or confer resistance to herbicides are found within clans 71**

984 **and 72.** Table adapted from [10].

985

986 **S4 Table. Plant GST proteins that conjugate or confer resistance to herbicides are members of**

987 **classes Phi, Tau, and Lambda.** Maize and *A. thaliana* genes were renamed according to current

988 nomenclature [21].

989

990 **S5 Table. Candidate NTSR CYPs are found within clans 71, 72, 85 and 86.**

991

992 **S6 Table. Candidate NTSR genes belong to several GST classes.** The organophosphorus class refers

993 to the herbicide glyphosate.

994

995 **S7 Table. Number of GST proteins identified from classes 2N, Kappa, and MAPEG in green plants**

996 **and red algae.** Sequences from these classes were not included in the phylogenetic analysis due to

997 lack of classical N-terminal and C-terminal GST domains. 2N GST sequences have two N-terminal

998 domains and lack a C-terminal domain. Kappa GST proteins lack the two classical GST domains and

999 instead have one single thioredoxin-like kappa GST domain (InterPro domain IPR014440). MAPEG GST  
1000 proteins lack both C and N-terminal GST domains and have instead a single 'MAPEG' domain.

1001

1002 **S3 Fig. Untrimmed amino acid alignment of representative CYP proteins from each clan showing**  
1003 **the location of conserved CYP domains.** Representative sequences from each plant species in this  
1004 study are included for each clan. Sequences were aligned in MAFFT using the FFT-NS-i algorithm. The  
1005 locations of the substrate recognition sites are based on those identified in Arabidopsis CYPs in [25].  
1006 The absolutely conserved cysteine that binds the heme within the heme-binding domain is marked  
1007 with an asterisk.

1008

1009 **S4 Fig. Amino acid alignment of representative plant GST proteins showing the location of**  
1010 **conserved GST domains.** Sequences were aligned in MAFFT using the FFT-NS-I algorithm. Four  
1011 representative sequences from different species are shown for each GST class. The location of the  
1012 putative catalytic residue is indicated with an asterisk. Predicted GSH-binding sites (G-sites) based on  
1013 the crystal structure of TaGSTU4 [29] are indicated in solid pink, and G-sites based on the crystal  
1014 structure of PtGSTF1 [121] are indicated by pink boxes. Predicted substrate-binding sites (H-sites)  
1015 based on the crystal structure of TaGSTU4 [29] are indicated in solid green, and H-sites based on the  
1016 crystal structure of PtGSTF1 [121] are indicated by green boxes. Residues conserved in at least 80%  
1017 of samples are indicated by black arrows. GSTHs and GSTIs have large domains that extend past the  
1018 C-terminal domain end which haven't been included in the figure. Large gaps caused by single  
1019 sequences were removed for clarity.

1020

1021 **S1 Text. Untrimmed alignment of all CYP sequences used in the phylogenetic analysis.**

1022

1023 **S2 Text. Manually trimmed alignment of all CYP sequences used in the phylogenetic analysis.**

1024

1025 **S3 Text. Trimmed alignment of all CYP sequences used in the phylogenetic analysis using the**  
1026 **trimAI -gappyout automated setting.**

1027

1028 **S4 Text. Trimmed alignment of all CYP sequences used in the phylogenetic analysis using the**  
1029 **trimAI -strict automated setting.**

1030

1031 **S5 Text. Trimmed alignment of all CYP sequences used in the phylogenetic analysis using the**  
1032 **trimAI -strictplus automated setting.**

1033

1034 **S6 Text. Untrimmed alignment of all GST sequences used in the phylogenetic analysis.**

1035

1036 **S7 Text. Manually trimmed alignment of all GST sequences used in the phylogenetic analysis.**

1037

1038 **S8 Text. Trimmed alignment of all GST sequences used in the phylogenetic analysis using the**  
1039 **trimAI -gappyout automated setting.**

1040

1041 **S9 Text. Trimmed alignment of all GST sequences used in the phylogenetic analysis using the**  
1042 **trimAI -strict automated setting.**

1043

1044 **S10 Text. Trimmed alignment of all GST sequences used in the phylogenetic analysis using the**  
1045 **trimAI -strictplus automated setting.**

A

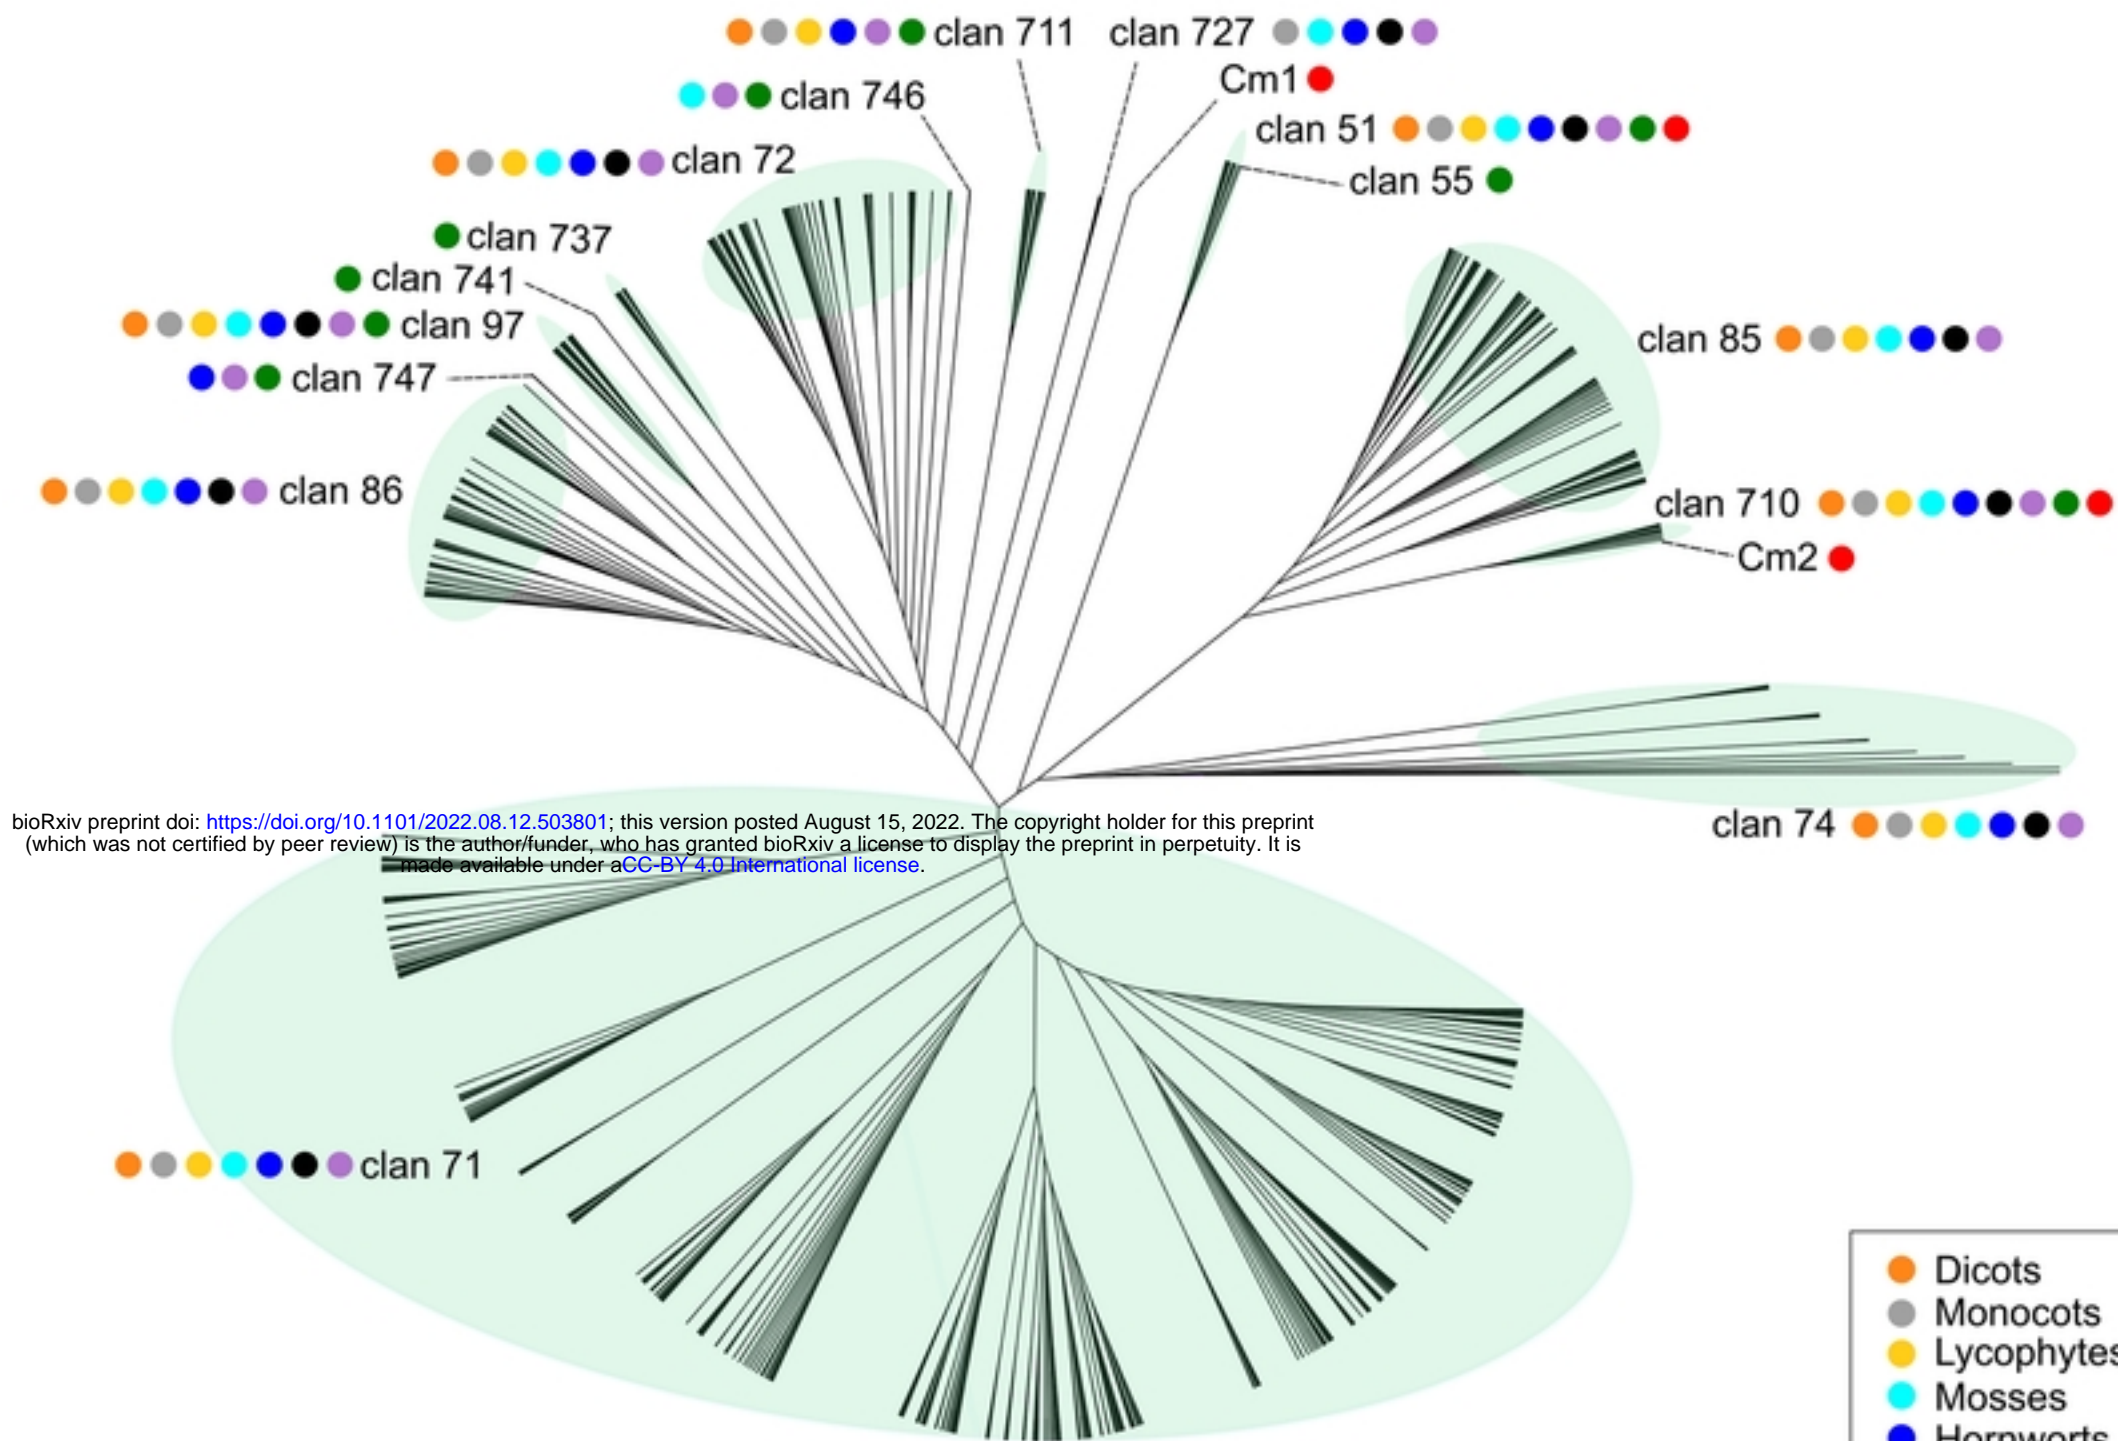

B

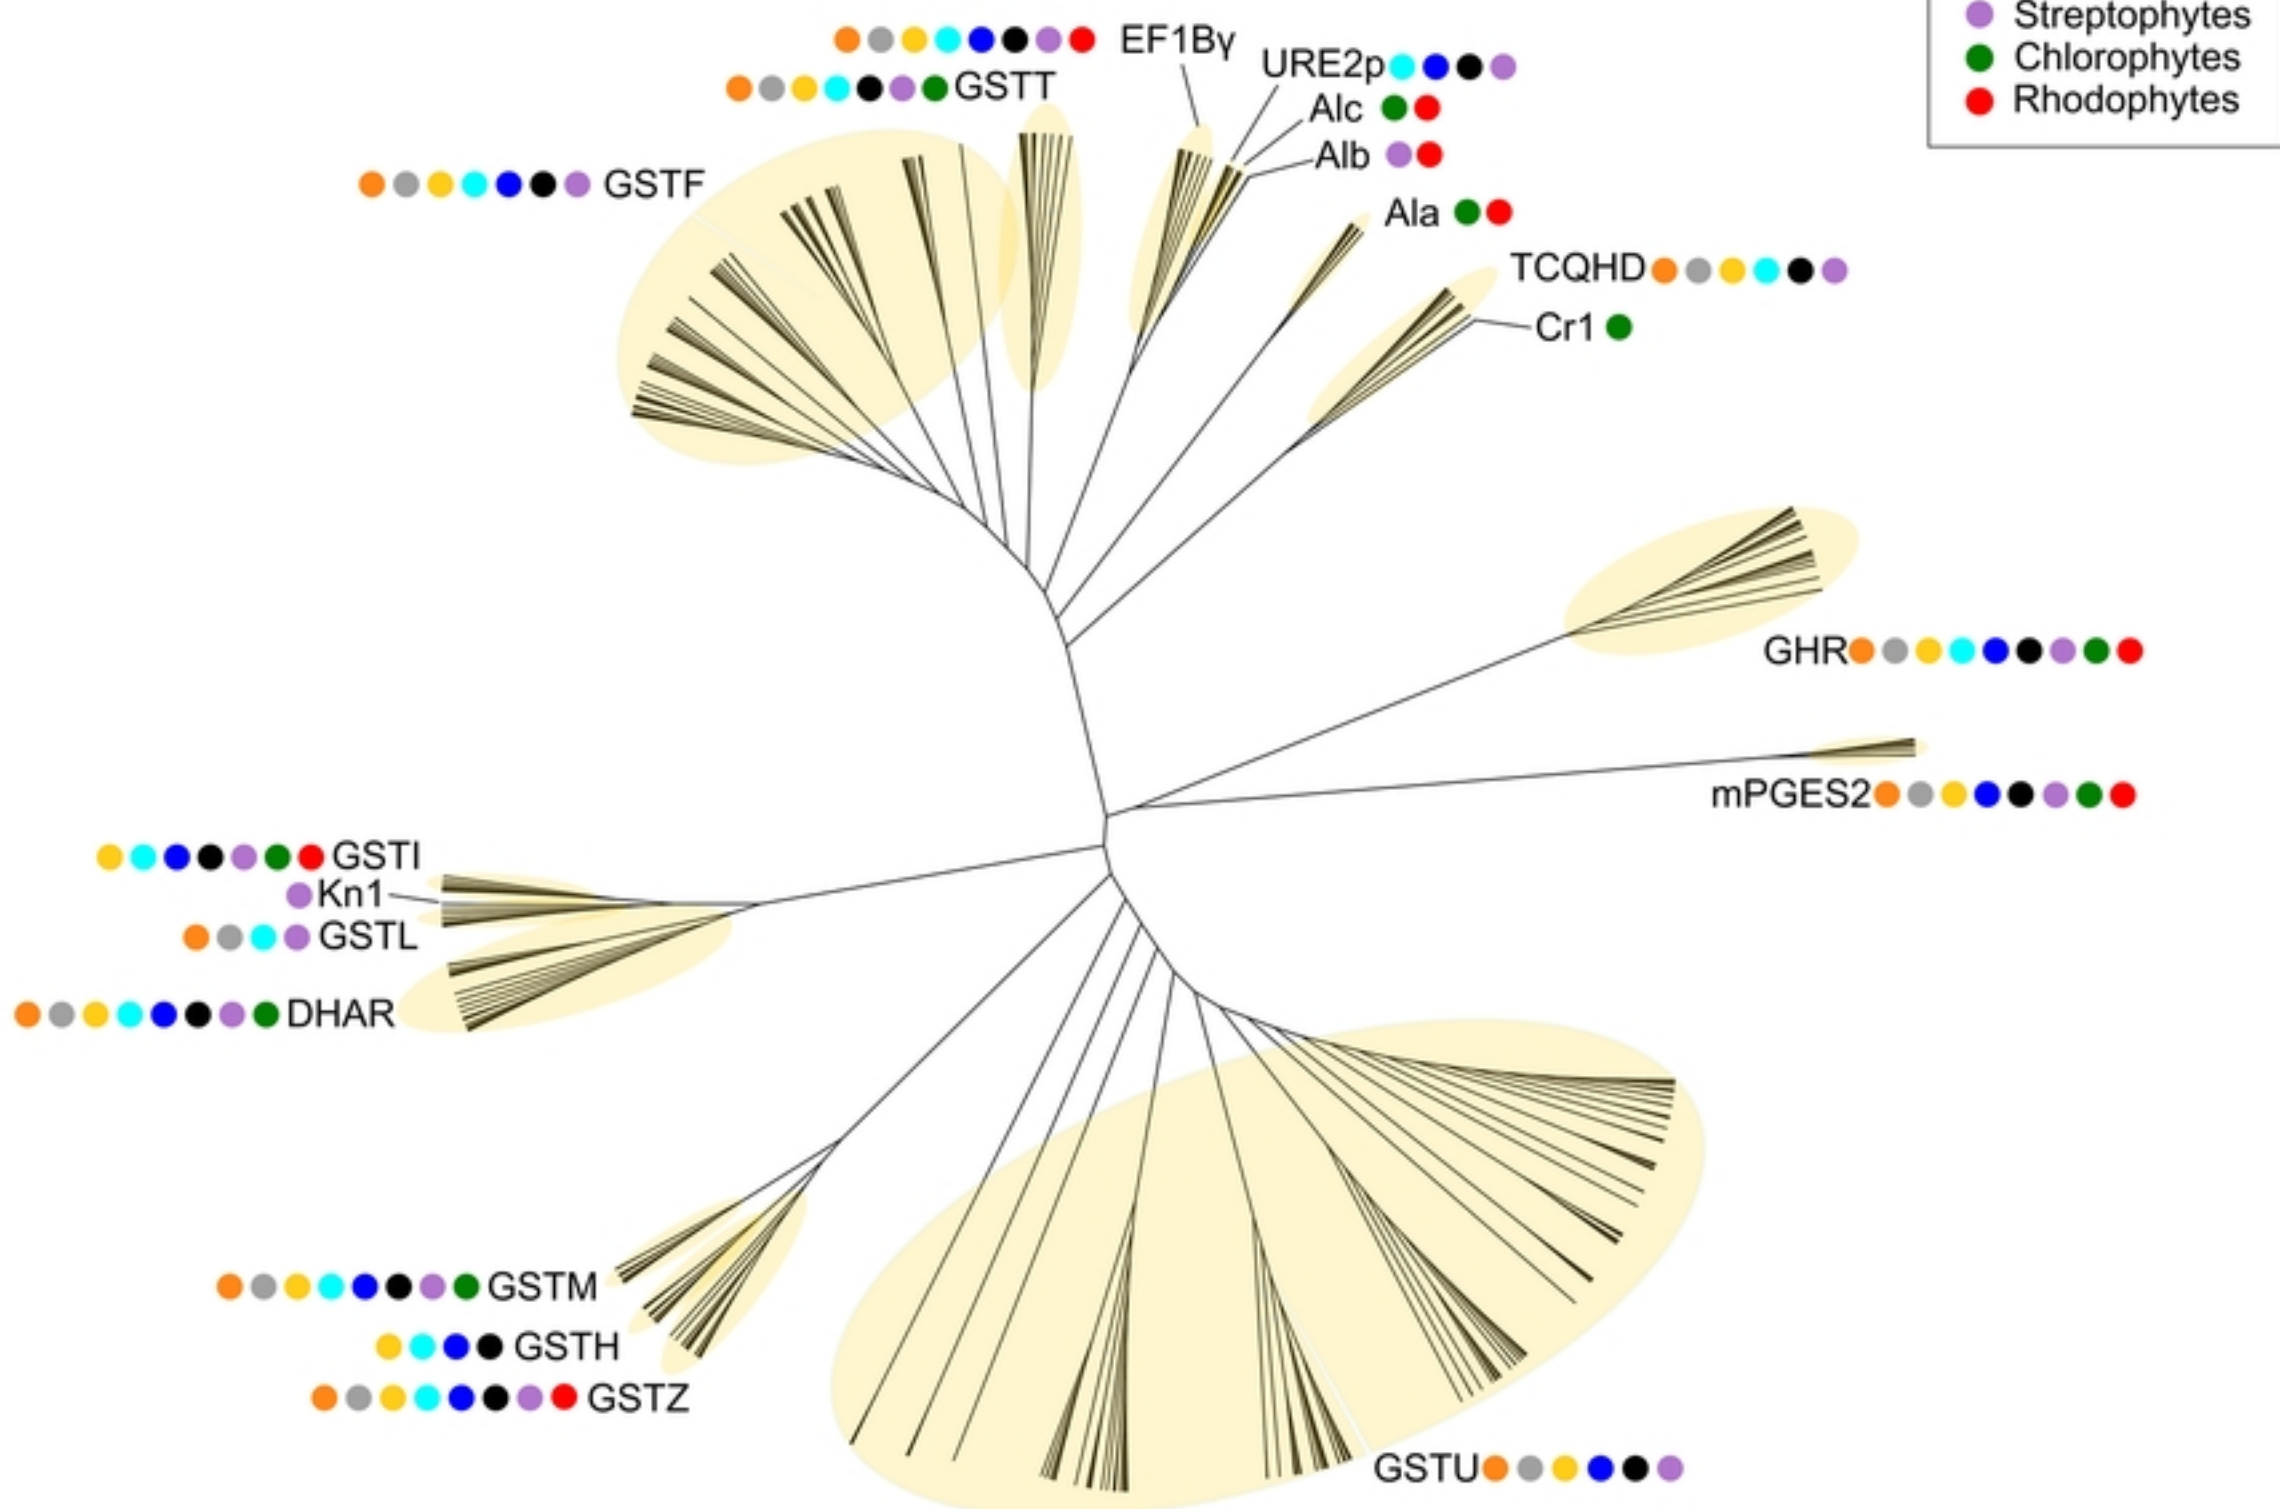



A

bioRxiv preprint doi: <https://doi.org/10.1101/2022.08.12.503801>; this version posted August 15, 2022. The copyright holder for this preprint (which was not certified by peer review) is the author/funder, who has granted bioRxiv a license to display the preprint in perpetuity. It is made available under aCC-BY 4.0 International license.

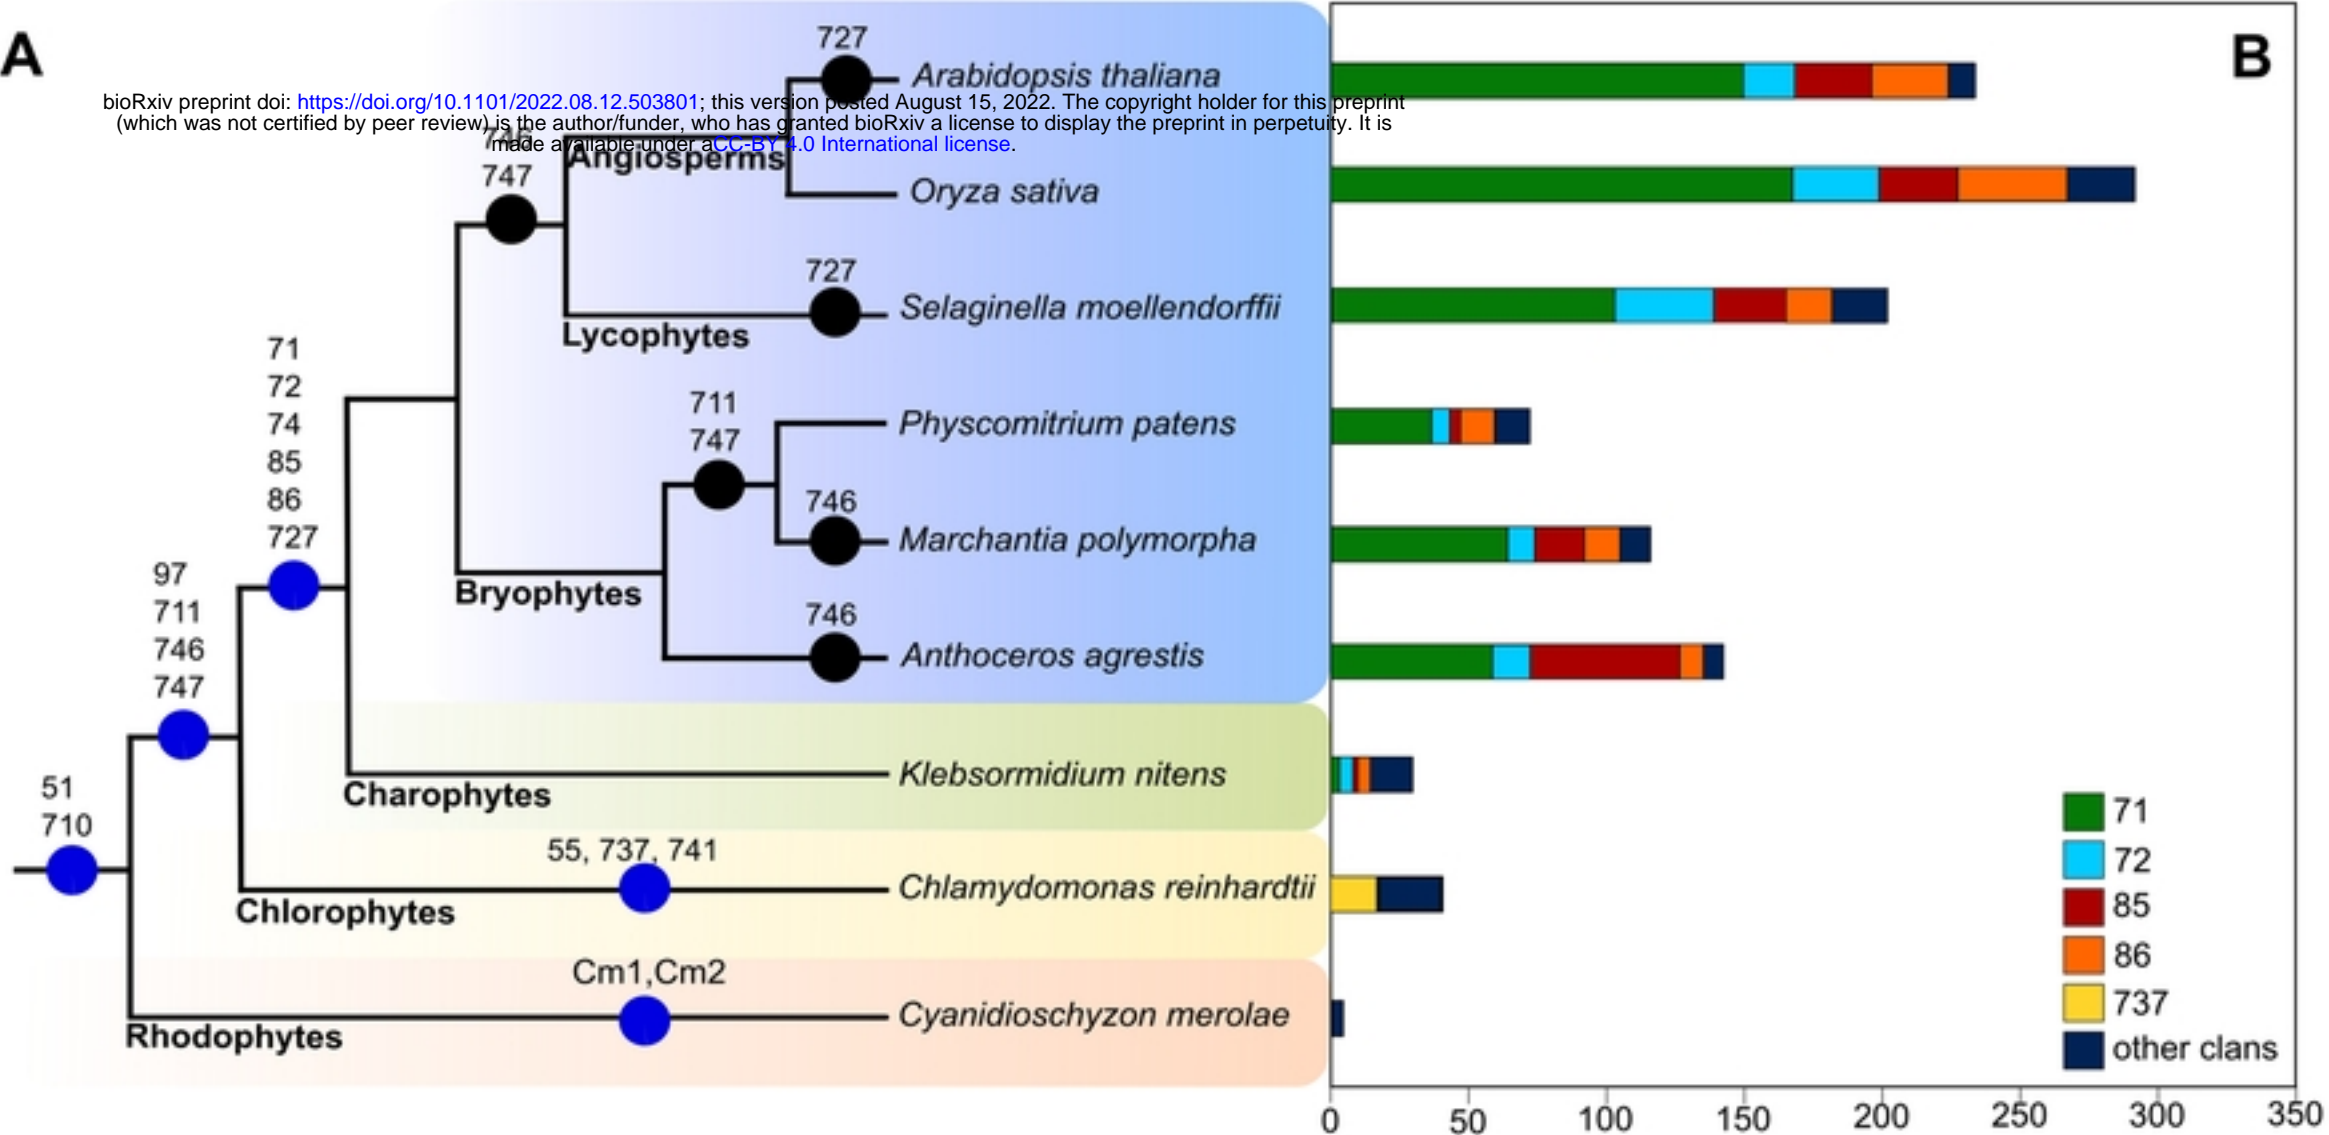

B

C

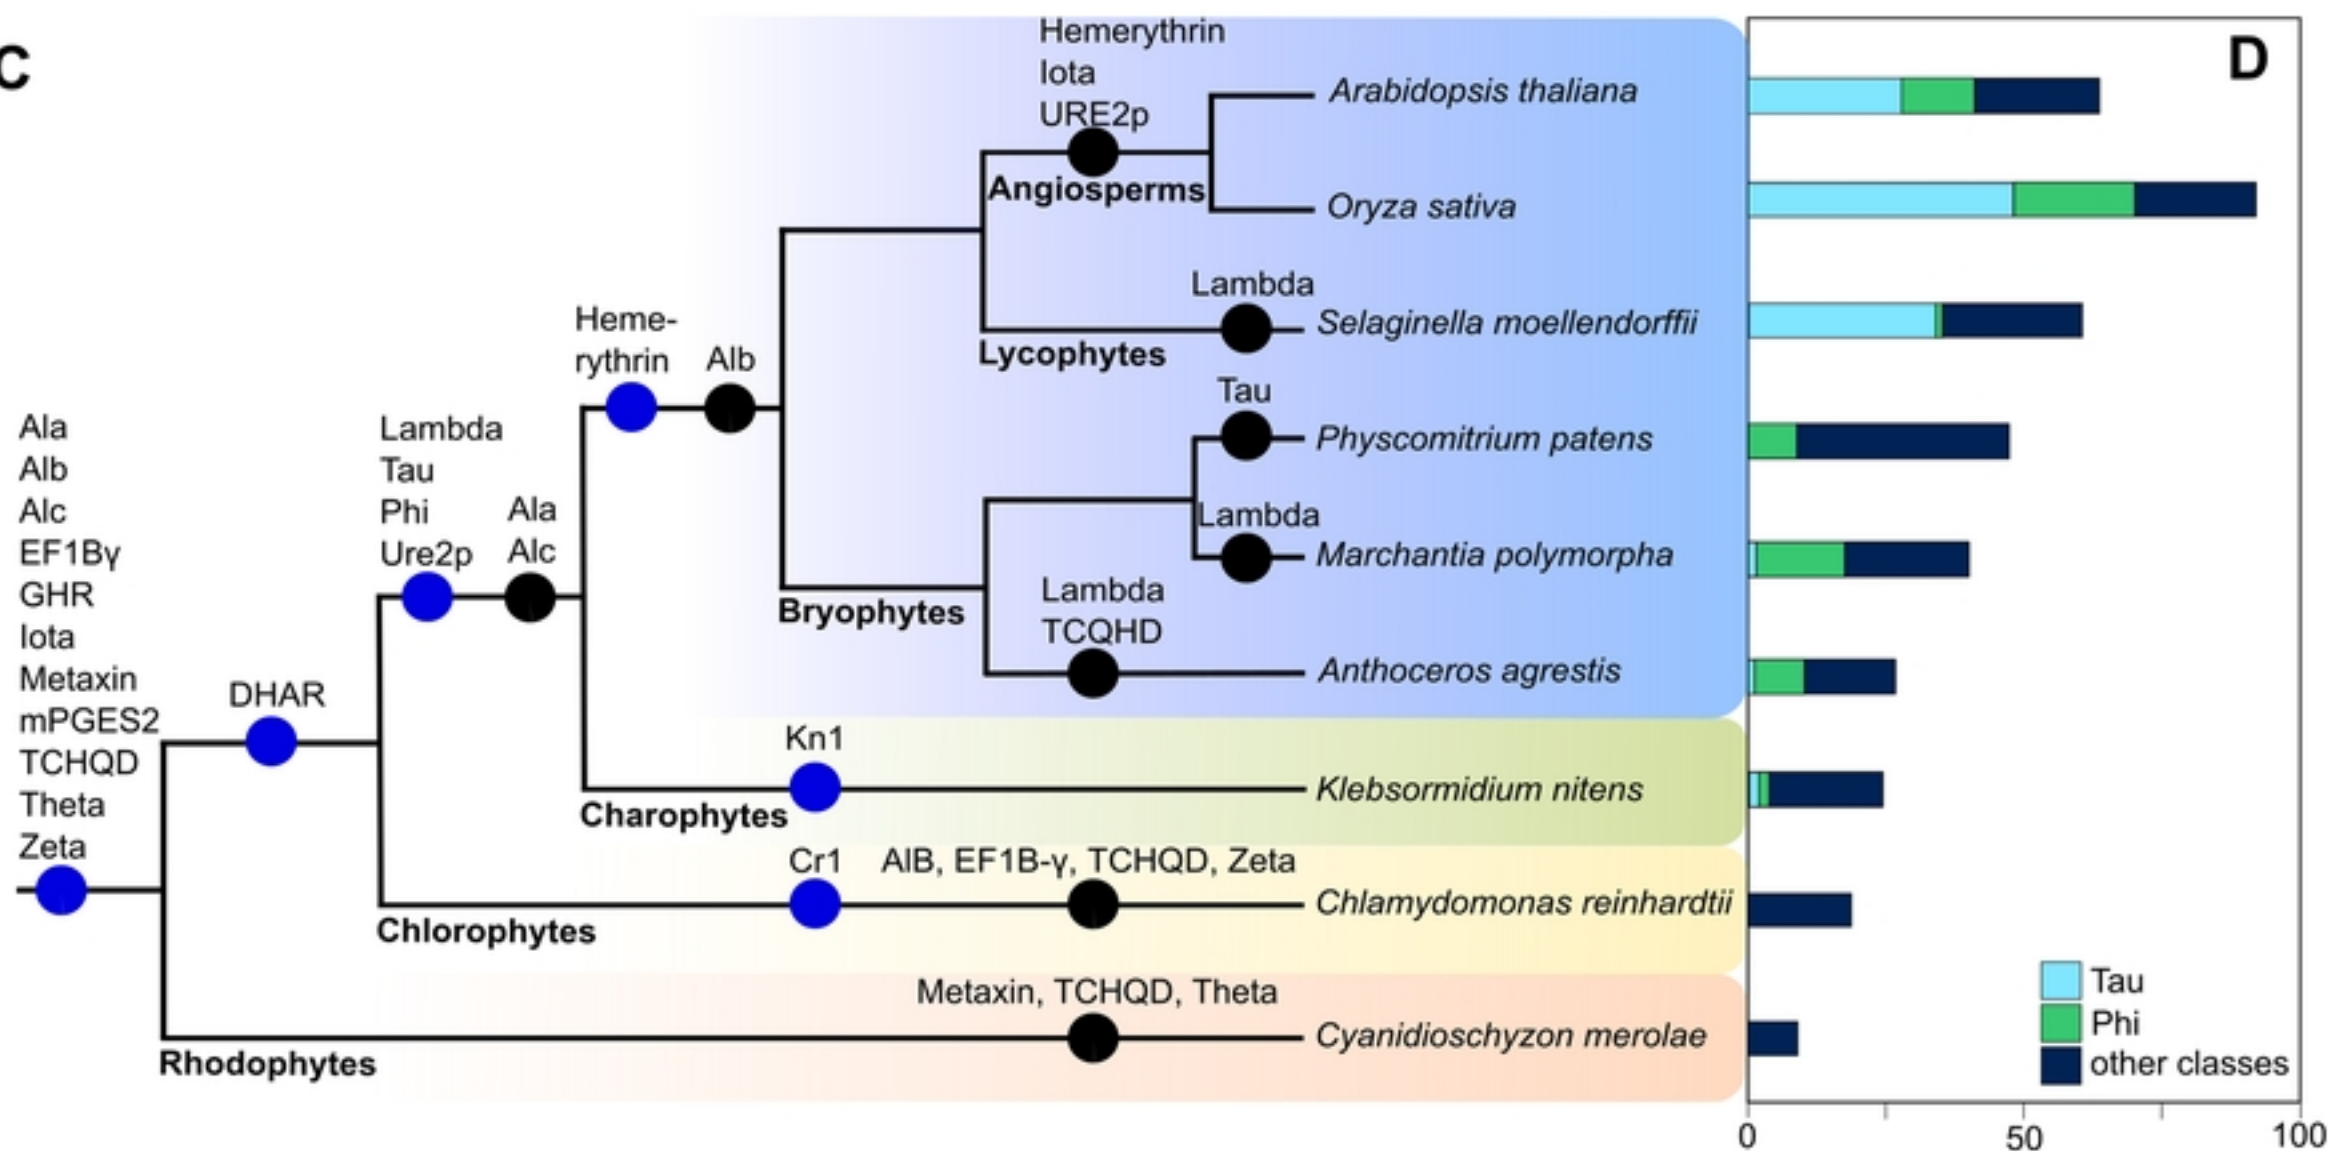

D

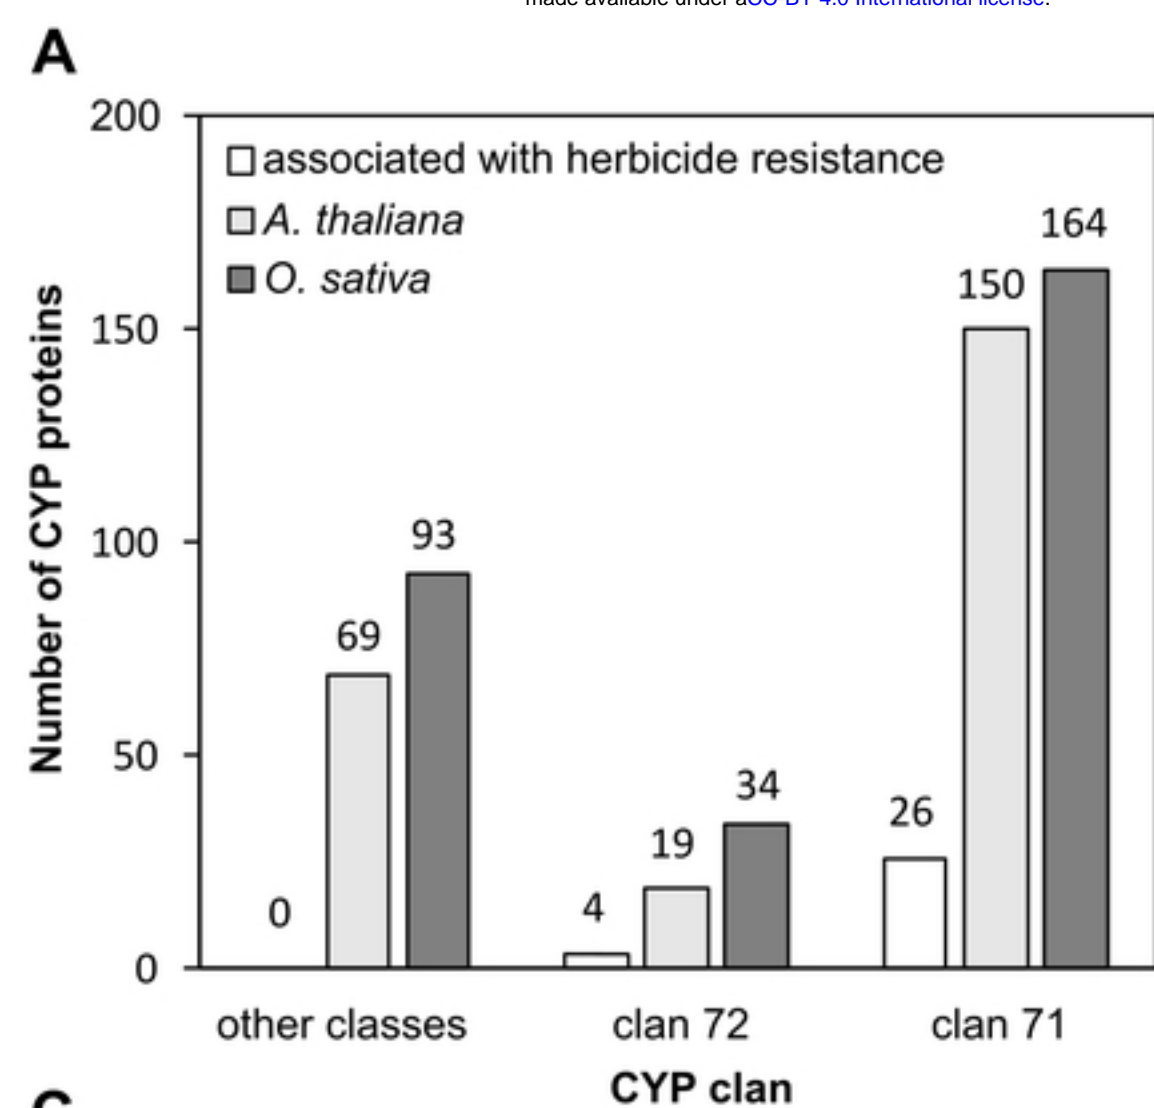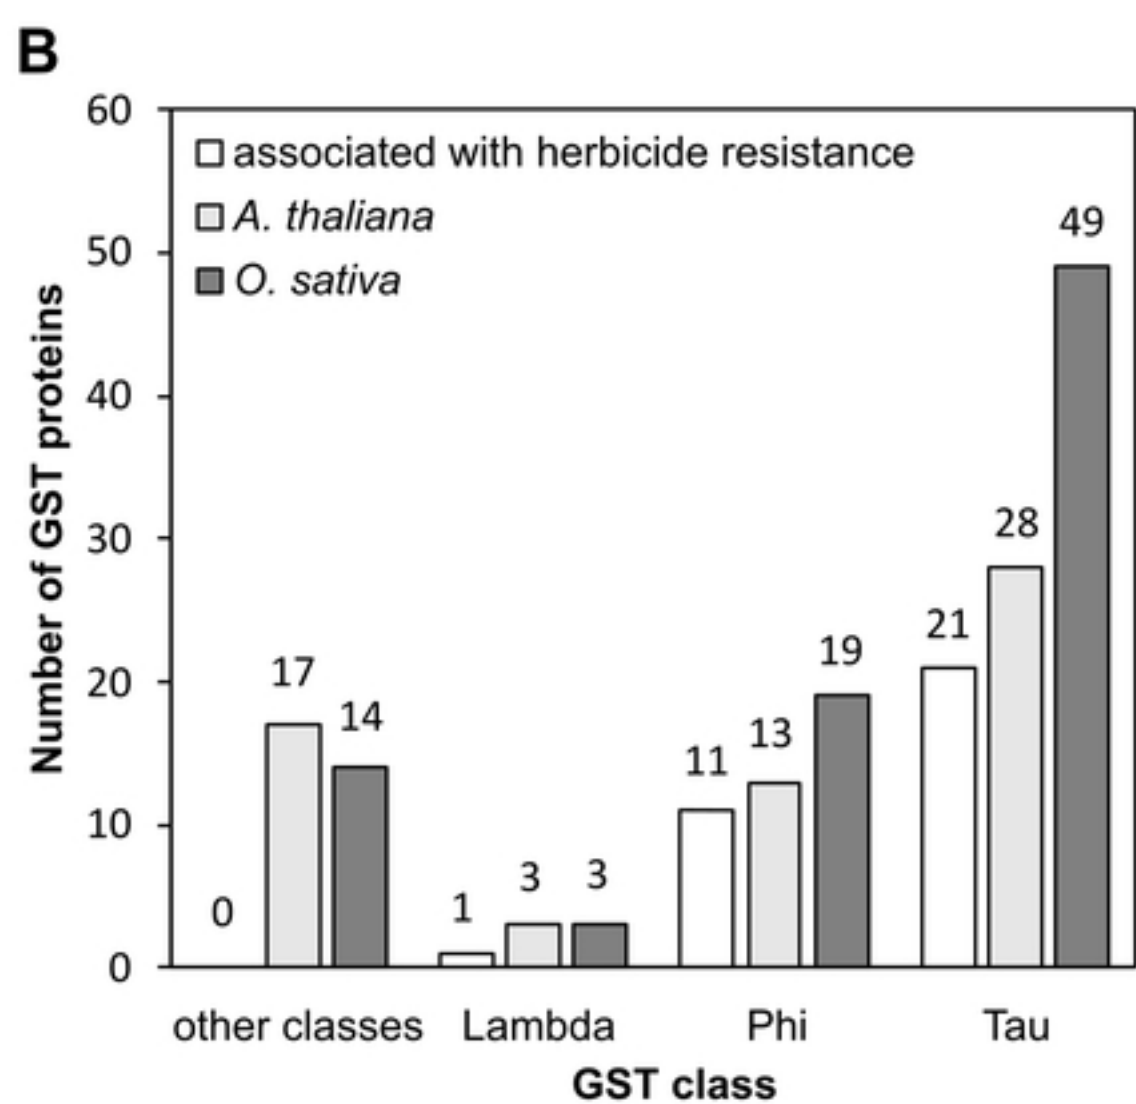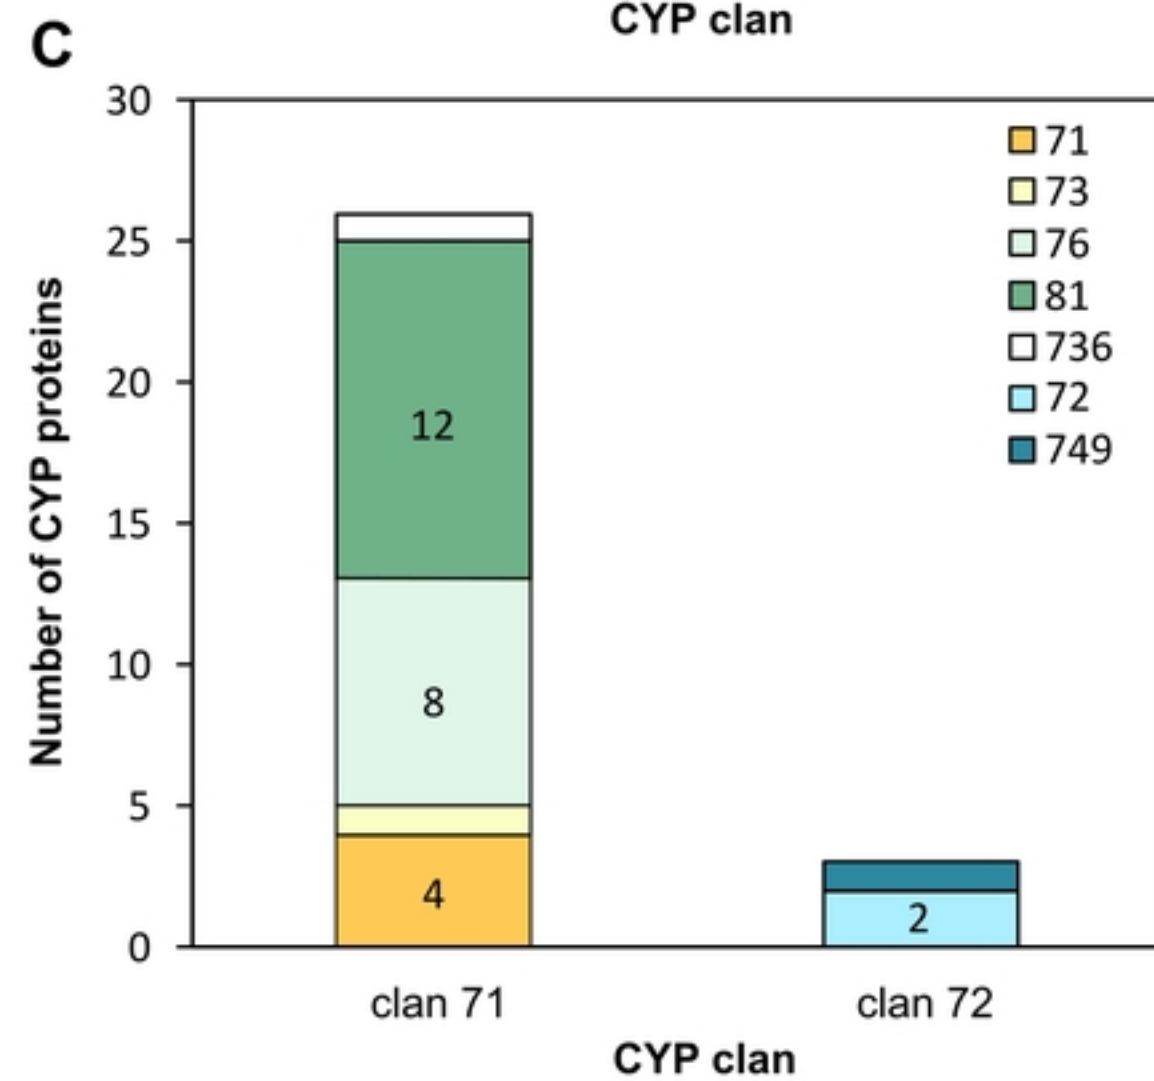

Source: https://www.biorxiv.org/content/10.1101/2022.08.12.503801v1.full.pdf
